# Supplementary material
Source: Elsevier journal article supplement (https://www.sciencedirect.com/science/article/pii/S2530064420300596)
Supplement: mmc1 [file S2530064420300596:mmc1.docx]

**Supporting information**

**Supplemental Table 1.** GenBank® accession numbers and IUCN category of analyzed vertebrates.

**Supplemental Table 2.** GenBank® accession numbers of analyzed virus.

**Supplemental Table 3.** Matrix for physico-chemical-similarly value assignation.

**Supplemental Table 4.**  Total physico-chemical-similarly value per species.

**Supplemental Table 5.** Comparative rank of different species of different domestic and wild vertebrate species based on the value of the three models.
