# Supplementary material
Source: Elsevier journal article supplement (https://www.sciencedirect.com/science/article/pii/S2530064420300596)
Supplement: mmc2 [file S2530064420300596:mmc2.xlsx]

## Sheet: ACE2
Species	Acces Num	IUCN status
Homo sapiens	AAT45083.1
Pan troglodytes	XP_016798468.1	EN
Pan paniscus	XP_008972428.1	EN
Gorilla gorilla	XP_018874749.1	CR
Hylobates moloch	XP_032612508.1	EN
Nomascus leucogenys	XP_003261132.2	CR
Pongo abelii	XP_024096013.1	CR
Piliocolobus tephrosceles	XP_023054821.1	EN
Papio anubis	XP_021788732.1	LC
Macaca mulatta	XP_014982444.2	LC
Macaca nemestrina	XP_011733505.1	EN
Theropithecus gelada	XP_025227847.1	LC
Rhinopithecus roxellana	XP_010364367.2	EN
Aotus nancymaae	XP_012290105.1	VU
Sapajus apella	XP_032141854.1	LC
Callithrix jacchus	XP_008987241.1	LC
Nannospalax galili	XP_008839098.1	DD
Delphinapterus leucas	XP_022418360.1	LC
Monodon monoceros	XP_029095804.1	LC
Neophocaena asiaeorientalis	XP_024599894.1	EN
Phocoena sinus	XP_032476002.1	CR
Ictidomys tridecemlineatus	XP_005316051.3	LC
Felis catus	XP_023104564.1	IS, DO*
Lynx canadensis	XP_030160839.1	LC
Panthera pardus	XP_019273508.1	VU
Ovis aries	XP_011961657.1	IS, DO
Bos indicus x Bos taurus	XP_027389727.1	IS, DO
Bos taurus	XP_005228485.1	IS, DO
Odocoileus virginianus	XP_020768965.1	LC
Panthera tigris	XP_007090142.1	EN
Urocitellus parryii	XP_026252505.1	LC
Puma concolor	XP_025790417.1	LC
Mesocricetus auratus	XP_005074266.1	VU
Vicugna pacos	XP_006212709.1	IS, DO
Acinonyx jubatus	XP_026910297.1	VU
Physeter catodon	XP_023971279.1	VU
Heterocephalus glaber	XP_004866157.1	LC
Ursus arctos	XP_026333865.1	LC
Canis dingo	XP_025292925.1	-
Canis familiaris	XP_013966804.1	IS, DO
Vulpes vulpes	XP_025842512.1	LC
Peromyscus leucopus	XP_028743609.1	LC
Balaenoptera acutorostrata	XP_028020351.1	LC
Equus caballus	XP_001490241.1	IS, DO
Camelus dromedarius	XP_010991717.1	IS, DO	La iucn no tiene clasificacion para esta especie que es domestica y en australia es invasora
Camelus ferus	XP_006194263.1	CR
Manis javanica	XP_017505746.1	CR
Microcebus murinus	XP_020140826.1	LC
Phoca vitulina	XP_032245506.1	LC
Microtus ochrogaster	XP_005358818.1	LC
Cricetulus griseus	XP_027288607.1	-
Carlito syrichta	XP_008062810.1	-
Lagenorhynchus obliquidens	XP_026951598.1	LC
Globicephala melas	XP_030703991.1	LC
Loxodonta africana	XP_023410960.1	VU
Eumetopias jubatus	XP_027970822.1	NT
Orcinus orca	XP_004269705.1	DD
Callorhinus ursinus	XP_025713397.1	VU
Otolemur garnettii	XP_003791912.1	LC
Octodon degus	XP_023575315.1	LC
Pteropus alecto	XP_006911709.1	LC
Pteropus vampyrus	XP_011361275.1	NT
Zalophus californianus	XP_027465353.1	LC
Mustela erminea	XP_032187677.1	LC
Mustela putorius	NP_001297119.1	LC
Suricata suricatta	XP_029786256.1	LC
Phyllostomus discolor	XP_028378317.1	LC
Lontra canadensis	XP_032736028.1	LC
Vombatus ursinus	XP_027691156.1	LC
Rhinolophus ferrumequinum	XP_032963186.1	LC
Tupaia chinensis	XP_006164754.1	-
Mastomys coucha	XP_031226742.1	LC
Desmodus rotundus	XP_024425698.1	LC
Rattus norvegicus	AAW78017.1	LC, IS, DO
Grammomys surdaster	XP_028617961.1	-
Empidonax traillii	XP_027757151.1	LC
Serinus canaria	XP_009087922.1	LC
Nothoprocta perdicaria	XP_025891105.1	LC
Echinops telfairi	XP_004710002.1	LC
Ornithorhynchus anatinus	XP_001515597.2	NT
Myotis lucifugus	XP_023609437.1	EN
Corvus moneduloides	XP_031956594.1	LC
Rattus rattus	XP_032746145.1	LC, IS, DO
Dromaius novaehollandiae	XP_025976569.1	LC
Taeniopygia guttata	XP_002194303.4	LC
Cyanistes caeruleus	XP_023774184.1	LC
Corvus cornix	XP_010392735.2	-
Neopelma chrysocephalum	XP_027544864.1	LC
Zonotrichia albicollis	XP_005491832.2	LC
Camarhynchus parvulus	XP_030811385.1	LC
Tyto alba	XP_032865981.1	LC
Anas platyrhynchos	XP_012949915.2	LC
Mus musculus	ABN80106.1	LC, IS, DO
Lonchura striata	XP_021388026.1	LC
Corapipo altera	XP_027494818.1	LC
Apteryx rowi	XP_025942946.1	VU
Manacus vitellinus	XP_017939494.2	LC
Pipra filicauda	XP_027593974.1	LC
Athene cunicularia	XP_026705725.1	LC
Strigops habroptila	XP_030332639.1	CR
Gallus gallus	XP_416822.2	LC, DO
Numida meleagris	XP_021240731.1	LC
Calypte anna	XP_008492997.2	LC
Rhinatrema bivittatum	XP_029459086.1	LC
Aquila chrysaetos	XP_029855025.1	LC
Falco cherrug	XP_005443093.2	EN
Protobothrops mucrosquamatus	XP_029140508.1	LC
Pseudonaja textilis	XP_026570054.1	LC
Coturnix japonica	XP_015742063.1	NT
Meleagris gallopavo	XP_019467554.1	LC
Catharus ustulatus	XP_032907631.1	LC
Phasianus colchicus	XP_031451919.1	LC
Microcaecilia unicolor	XP_030058174.1	LC
Python bivittatus	XP_007431942.2	VU
Chrysemys picta	XP_023964517.1	LC
Chelonia mydas	XP_007070561.1	EN
Pelodiscus sinensis	XP_006122891.1	VU
Gopherus evgoodei	XP_030407881.1	VU
Chelonoidis abingdonii	XP_032631197.1	EX
Pogona vitticeps	XP_020642422.1	LC
Enhydra lutris	XP_022374078.1	EN
Marmota flaviventris	XP_027802308.1	LC
Neomonachus schauinslandi	XP_021536480.1	EN
Paguma larvata	AAX63775.1	LC
Rhinolophus sinicus	AGZ48803.1	LC
Eptesicus fuscus	XP_008153150.1	LC
Trichechus manatus	XP_004386381.1	VU
Terrapene carolina	XP_026504918.1	VU
Thamnophis elegans	XP_032082934.1	LC
Melopsittacus undulatus	XP_005151516.1	LC
IUCN Red List Categories
DD: Data deficient
LC: Least concern
NT: Near threatened
VU: Vulnerable
EN: Endangered
CR: Critically endangered
EX: Extinct
*No IUCN valid categories
DO: Domestic species
IS: Invasive species
Reference
IUCN. 2012. IUCN Red List Categories and Criteria: Version 3.1. Second edition. Gland, Switzerland and Cambridge, UK: IUCN. Iv + 32pp

## Sheet: TMPRSS
Species	Acces Num	IUCN status
Homo sapiens	NP_001128571.1
Pan troglodytes	XP_016794054.1	EN
Pan paniscus	XP_003823951.1	EN
Gorilla gorilla	XP_018873446.1	CR
Hylobates moloch	XP_032030147.1	EN
Nomascus leucogenys	XP_003280442.2	CR
Pongo abelii	XP_024095307.1	CR
Piliocolobus tephrosceles	XP_023047647.1	EN
Papio anubis	XP_009200480.2	LC
Macaca mulatta	XP_028701148.1	LC
Macaca nemestrina	XP_011724292.1	EN
Theropithecus gelada	XP_025236544.1	LC
Rhinopithecus roxellana	XP_010352810.2	EN
Aotus nancymaae	XP_021525165.1	VU
Sapajus apella	XP_032132711.1	LC
Callithrix jacchus	XP_008984970	LC
Nannospalax galili	XP_008825630.2	DD
Delphinapterus leucas	XP_022408667.1	LC
Monodon monoceros	XP_029070306.1	LC
Neophocaena asiaeorientalis	XP_024614090.1	EN
Phocoena sinus	XP_032487328.1	CR
Ictidomys tridecemlineatus	XP_021580931.1	LC
Felis catus	XP_023094477.1	IS, DO*
Lynx canadensis	XP_030185863.1	LC
Panthera pardus	XP_019275941.1	VU
Ovis aries	XP_027816505.1	IS, DO
Bos indicus x Bos taurus	XP_027402296.1	IS, DO
Bos taurus	XP_015329141.1	IS, DO
Odocoileus virginianus	XP_020763597.1	LC
Panthera tigris	XP_015396688.1	EN
Urocitellus parryii	XP_026235220.1	LC
Puma concolor	XP_025768873.1	LC
Mesocricetus auratus	XP_012971681.1	VU
Vicugna pacos	XP_031540200.1	IS, DO
Acinonyx jubatus	XP_016794054.1	VU
Physeter catodon	XP_023976128.1	VU
Heterocephalus glaber	XP_004842514.1	LC
Ursus arctos	XP_026355755.1	LC
Canis dingo	XP_0253178827.1	-
Canis familiaris	BBD33861.1	IS, DO
Vulpes vulpes	XP_025839165.1	LC
Peromyscus leucopus	XP_028716145.1	LC
Balaenoptera acutorostrata	XP_007172770.1	LC
Equus caballus	XP_005606217.1	IS, DO
Camelus dromedarius	XP_031315750.1	IS, DO
Camelus ferus	XP_032317729.1	CR
Manis javanica	XP_017508124.1	CR
Microcebus murinus	XP_012605290.2	LC
Phoca vitulina	XP_032248428.1	LC
Microtus ochrogaster	XP_013210272.1	LC
Cricetulus griseus	RLQ67233.1	-
Carlito syrichta	XP_008066754.1	-
Lagenorhynchus obliquidens	XP_026978429.1	LC
Globicephala melas	XP_030691263.1	LC
Loxodonta africana	XP_023414879.1	VU
Eumetopias jubatus	XP_027982299.1	NT
Orcinus orca	XP_033274234.1	DD
Callorhinus ursinus	XP_025719297.1	VU
Otolemur garnettii	XP_023373862.1	LC
Octodon degus	XP_023571705.1	LC
Pteropus alecto	XP_024905986.1	LC
Pteropus vampyrus	XP_023393967.1	NT
Zalophus californianus	XP_027443645.1	LC
Mustela erminea	XP_032211410.1	LC
Mustela putorius	XP_012916721.1	LC
Suricata suricatta	XP_029794796.1	LC
Phyllostomus discolor	XP_028360491.1	LC
Lontra canadensis	XP_032721190.1	LC
Vombatus ursinus	XP_027699426.1	LC
Rhinolophus ferrumequinum	XP_032944694.1	LC
Tupaia chinensis	XP_027630699.1	-
Mastomys coucha	XP_031220699.1	LC
Desmodus rotundus	XP_024417592.1	LC
Rattus norvegicus	BAB70683.1	LC, IS, DO
Grammomys surdaster	XP_028608373.1	-
Empidonax traillii	XP_027743201.1	LC
Serinus canaria	XP_009087991.1	LC
Nothoprocta perdicaria	AAH61712.1	LC
Echinops telfairi	XP_030744530.1	LC
Ornithorhynchus anatinus	XP_028902467.1	NT
Corvus moneduloides	XP_031956971.1	LC
Rattus rattus	XP_006104502.2	LC, IS
Dromaius novaehollandiae	XP_025977368.1	LC
Taeniopygia guttata	XP_030139669.1	LC
Cyanistes caeruleus	XP_023780117.1	LC
Corvus cornix	XP_010392952.1	LC
Neopelma chrysocephalum	XP_027544974.1	LC
Zonotrichia albicollis	XP_005489082.1	LC
Camarhynchus parvulus	XP_030810920.1	LC
Tyto alba	XP_009962116.2	LC
Anas platyrhynchos	XP_027304172.1	LC
Mus musculus	AAF97867.1	LC, IS, DO
Lonchura striata	XP_031362216.1	LC
Corapipo altera	XP_027491013.1	LC
Apteryx rowi	XP_025933557.1	VU
Manacus vitellinus	XP_017939879.2	LC
Pipra filicauda	XP_027597757.1	LC
Athene cunicularia	XP_026702289.1	LC
Strigops habroptila	XP_030332969.1	CR
Gallus gallus	XP_015156666.1	LC, DO
Numida meleagris	XP_021261680.1	LC
Calypte anna	XP_0325244.1	LC
Rhinatrema bivittatum	XP_029434444.1	LC
Aquila chrysaetos	XP_029876297.1	LC
Falco cherrug	XP_005438640.1	EN
Protobothrops mucrosquamatus	XP_015672411.1	LC
Pseudonaja textilis	XP_026569441.1	LC
Coturnix japonica	XP_015738387.1	NT
Meleagris gallopavo	XP_010722229.1	LC
Catharus ustulatus	XP_032909510.1	LC
Phasianus colchicus	XP_031468375.1	LC
Microcaecilia unicolor	XP_030059680.1	LC
Python bivittatus	XP_025031165.1	VU
Chrysemys picta	XP_023956311.1	LC
Chelonia mydas	XP_007064535.2	EN
Pelodiscus sinensis	XP_014432687.1	VU
Gopherus evgoodei	XP_030433215.1	VU
Chelonoidis abingdonii	XP_032631209.1	EX
Pogona vitticeps	XP_020645030.1	LC
IUCN Red List Categories
DD: Data deficient
LC: Least concern
NT: Near threatened
VU: Vulnerable
EN: Endangered
CR: Critically endangered
EX: Extinct
*No IUCN valid categories
DO: Domestic species
IS: Invasive species
Reference
IUCN. 2012. IUCN Red List Categories and Criteria: Version 3.1. Second edition. Gland, Switzerland and Cambridge, UK: IUCN. Iv + 32pp
