# Supplementary material
Source: Elsevier journal article supplement (https://www.sciencedirect.com/science/article/pii/S2530064420300596)
Supplement: mmc4 [file S2530064420300596:mmc4.xlsx]

## Sheet: Sheet1
		Tiny	Small	Large	Hidrophilic	Modetare	Hidrophobic	pos	neu	neg	Polar	Amphipatic	No polar
Serine	S	1			1				1		1
Alanine	A	1					1		1				1
Glycine	G	1					1		1				1
Cysteine	C	1				1			1		1
Asparagine	N		1		1				1		1
Glutamine	Q			1	1				1		1
Threonine	T		1		1				1		1
Arginine	R			1	1			1					1
Aspartic acid	D		1		1					1			1
Glutamic acid	E			1	1					1			1
Lysine	K			1	1			1					1
Isoleucine	I			1			1		1				1
Leucine	L			1			1		1				1
Methionine	M			1		1			1			1	1
Proline	P		1				1		1				1
Valine	V		1				1		1				1
Phenylalanine	F			1			1		1				1
Tryptophan	W			1			1		1			1	1
Tyrosine	Y			1			1		1		1	1
Histicine	H			1		1		1			1
						O	T	H	E	R		S	P	E	C	I	E	S
		S	A	G	C	N	Q	T	R	D	E	K	I	L	M	P	V	F	W	Y	H
	S	X	0.45	0.45	0.7875	0.7875	0.675	0.7875	0.3375	0.45	0.3375	0.3375	0.225	0.225	0.45	0.3375	0.3375	0.225	0.3375	0.45	0.45
	A		X	0.9	0.5625	0.3375	0.225	0.3375	0.3375	0.45	0.3375	0.3375	0.675	0.675	0.5625	0.7875	0.7875	0.675	0.5625	0.5625	0.225
	G			X	0.5625	0.3375	0.225	0.3375	0.3375	0.45	0.3375	0.3375	0.675	0.675	0.5625	0.7875	0.7875	0.675	0.675	0.5625	0.225
	C				X	0.675	0.5625	0.675	0.225	0.3375	0.225	0.225	0.3375	0.3375	0.5625	0.45	0.45	0.3375	0.45	0.5625	0.5625
H	N					X	0.7875	0.9	0.45	0.5625	0.45	0.45	0.3375	0.3375	0.5625	0.45	0.45	0.3375	0.45	0.5625	0.5625
U	Q						X	0.7875	0.5625	0.45	0.5625	0.5625	0.45	0.45	0.675	0.3375	0.3375	0.45	0.5625	0.675	0.675
M	T							X	0.45	0.5625	0.45	0.45	0.3375	0.3375	0.5625	0.45	0.45	0.3375	0.45	0.5625	0.5625
A	R								X	0.5625	0.675	0.9	0.5625	0.5625	0.675	0.45	0.45	0.5625	0.5625	0.45	0.5625
N	D									X	0.7875	0.5625	0.45	0.45	0.5625	0.5625	0.5625	0.45	0.45	0.3375	0.225
	E										X	0.675	0.5625	0.5625	0.675	0.45	0.45	0.5625	0.5625	0.45	0.3375
	K											X	0.5625	0.5625	0.675	0.45	0.45	0.5625	0.5625	0.45	0.5625
	I												X	0.9	0.7875	0.7875	0.7875	0.9	0.9	0.7875	0.45
	L													X	0.7875	0.7875	0.7875	0.9	0.9	0.7875	0.45
	M														X	0.675	0.675	0.7875	0.7875	0.675	0.675
	P															X	0.9	0.7875	0.7875	0.675	0.3375
	V																X	0.7875	0.7875	0.675	0.3375
	F																	X	0.9	0.7875	0.45
	W																		X	0.7875	0.45
	Y																			X	0.675
	H																				X
