# Supplementary material
Source: Elsevier journal article supplement (https://www.sciencedirect.com/science/article/pii/S2530064420300596)
Supplement: mmc5 [file S2530064420300596:mmc5.xlsx]

## Sheet: suplemento 2
Supplementary Table. Physico-chemical-similarly value, similarity value of TMPRSS2 and Model 3 values.
Species	Significant positions of amino acids that interact with S protein of SARS-CoV-2																																										Model 2 PCSV	TMPRSS % similarity	Model 3 TMPRSS2*PCSV
	20		24		30		31		34		35		37		38		41		42		53		68		79		82		83		90		322		325		329		330		353
Homo sapiens	T		Q		D		K		H		E		E		D		Y		Q		N		K		L		M		Y		N		N		Q		E		N		K
Pan troglodytes	T	1	Q	1	D	1	K	1	H	1	E	1	E	1	D	1	Y	1	Q	1	N	1	K	1	L	1	M	1	Y	1	N	1	N	1	Q	1	E	1	N	1	K	1	1	1	1
Pan paniscus	T	1	Q	1	D	1	K	1	H	1	E	1	E	1	D	1	Y	1	Q	1	N	1	K	1	L	1	M	1	Y	1	N	1	N	1	Q	1	E	1	N	1	K	1	1	0.995781	0.995781
Gorilla gorilla	T	1	Q	1	D	1	K	1	H	1	E	1	E	1	D	1	Y	1	Q	1	N	1	K	1	L	1	M	1	Y	1	N	1	N	1	Q	1	E	1	N	1	K	1	1	0.983122	0.983122
Hylobates moloch	T	1	Q	1	D	1	K	1	H	1	E	1	E	1	D	1	Y	1	Q	1	N	1	K	1	L	1	M	1	Y	1	N	1	N	1	Q	1	E	1	N	1	K	1	1	0.962025	0.962025
Nomascus leucogenys	T	1	Q	1	D	1	K	1	H	1	E	1	E	1	D	1	Y	1	Q	1	N	1	K	1	L	1	M	1	Y	1	N	1	N	1	Q	1	E	1	N	1	K	1	1	0.953586	0.953586
Pongo abelii	T	1	Q	1	D	1	K	1	H	1	E	1	E	1	D	1	Y	1	Q	1	N	1	K	1	L	1	M	1	Y	1	N	1	N	1	Q	1	E	1	N	1	K	1	1	0.953586	0.953586
Piliocolobus tephrosceles	T	1	Q	1	D	1	K	1	H	1	E	1	E	1	D	1	Y	1	Q	1	N	1	K	1	L	1	M	1	Y	1	N	1	N	1	Q	1	E	1	N	1	K	1	1	0.92827	0.92827
Papio anubis	T	1	Q	1	D	1	K	1	H	1	E	1	E	1	D	1	Y	1	Q	1	N	1	K	1	L	1	M	1	Y	1	N	1	N	1	Q	1	E	1	N	1	K	1	1	0.911392	0.911392
Macaca mulatta	T	1	Q	1	D	1	K	1	H	1	E	1	E	1	D	1	Y	1	Q	1	N	1	K	1	L	1	M	1	Y	1	N	1	N	1	Q	1	E	1	N	1	K	1	1	0.907173	0.907173
Macaca nemestrina	T	1	Q	1	D	1	K	1	H	1	E	1	E	1	D	1	Y	1	Q	1	N	1	K	1	L	1	M	1	Y	1	N	1	N	1	Q	1	E	1	N	1	K	1	1	0.907173	0.907173
Theropithecus gelada	T	1	Q	1	D	1	K	1	H	1	E	1	E	1	D	1	Y	1	Q	1	N	1	K	1	L	1	M	1	Y	1	N	1	N	1	Q	1	E	1	N	1	K	1	1	0.902954	0.902954
Rhinopithecus roxellana	T	1	Q	1	D	1	K	1	H	1	E	1	E	1	D	1	Y	1	Q	1	N	1	K	1	L	1	M	1	Y	1	N	1	N	1	R	0.5625	E	1	N	1	K	1	0.5625	0.924051	0.519779
Aotus nancymaae	T	1	Q	1	D	1	K	1	H	1	E	1	E	1	D	1	H	0.675	E	0.5625	N	1	K	1	L	1	T	0.5625	Y	1	N	1	N	1	Q	1	E	1	N	1	K	1	0.213574	0.915612	0.195551
Sapajus apella	T	1	Q	1	D	1	K	1	H	1	E	1	E	1	D	1	H	0.675	E	0.5625	N	1	K	1	L	1	T	0.5625	Y	1	N	1	N	1	Q	1	E	1	N	1	K	1	0.213574	0.915612	0.195551
Callithrix jacchus	T	1	Q	1	D	1	K	1	H	1	E	1	E	1	D	1	H	0.675	E	0.5625	N	1	K	1	L	1	T	0.5625	Y	1	N	1	N	1	Q	1	E	1	N	1	K	1	0.213574	0.8608	0.183845
Nannospalax galili	-	-	Q	1	D	1	K	1	Q	0.675	E	1	E	1	D	1	Y	1	Q	1	N	1	K	1	L	1	K	0.675	Y	1	D	0.5625	Q	0.7875	Q	1	E	1	N	1	K	1	0.201828	0.890295	0.179686
Delphinapterus leucas	T	1	Q	1	Q	0.45	K	1	H	1	E	1	E	1	D	1	Y	1	Q	1	N	1	K	1	I	0.9	T	0.5625	Y	1	N	1	N	1	Q	1	D	0.7875	N	1	K	1	0.179402	0.902954	0.161992
Monodon monoceros	T	1	Q	1	Q	0.45	K	1	H	1	E	1	E	1	D	1	Y	1	Q	1	N	1	K	1	I	0.9	T	0.5625	Y	1	N	1	N	1	Q	1	D	0.7875	N	1	K	1	0.179402	0.902954	0.161992
Neophocaena asiaeorientalis	T	1	Q	1	Q	0.45	K	1	H	1	E	1	E	1	D	1	Y	1	Q	1	N	1	K	1	I	0.9	T	0.5625	Y	1	N	1	N	1	Q	1	D	0.7875	N	1	K	1	0.179402	0.898734	0.161235
Phocoena sinus	T	1	Q	1	Q	0.45	K	1	H	1	E	1	E	1	D	1	Y	1	Q	1	N	1	K	1	I	0.9	T	0.5625	Y	1	N	1	N	1	Q	1	D	0.7875	N	1	K	1	0.179402	0.898734	0.161235
Ictidomys tridecemlineatus	T	1	L	0.45	D	1	K	1	Q	0.675	E	1	E	1	D	1	Y	1	Q	1	N	1	K	1	L	1	A	0.5625	Y	1	N	1	N	1	Q	1	E	1	N	1	K	1	0.170859	0.902954	0.154278
Felis catus	T	1	L	0.45	E	0.7875	K	1	H	1	E	1	E	1	E	0.7875	Y	1	Q	1	N	1	K	1	L	1	T	0.5625	Y	1	N	1	N	1	Q	1	E	1	N	1	K	1	0.156977	0.902954	0.141743
Lynx canadensis	T	1	L	0.45	E	0.7875	K	1	H	1	E	1	E	1	E	0.7875	Y	1	Q	1	N	1	K	1	L	1	T	0.5625	Y	1	N	1	N	1	Q	1	E	1	N	1	K	1	0.156977	0.898734	0.141081
Panthera pardus	T	1	L	0.45	E	0.7875	K	1	H	1	E	1	E	1	E	0.7875	Y	1	Q	1	N	1	K	1	L	1	T	0.5625	Y	1	N	1	N	1	Q	1	E	1	N	1	K	1	0.156977	0.898734	0.141081
Ovis aries	T	1	Q	1	E	0.7875	K	1	H	1	E	1	E	1	D	1	Y	1	Q	1	N	1	K	1	M	0.7875	T	0.5625	Y	1	N	1	Y	0.5625	Q	1	D	0.7875	N	1	K	1	0.154524	0.911392	0.140832
Bos indicus x Bos taurus	T	1	Q	1	E	0.7875	K	1	H	1	E	1	E	1	D	1	Y	1	Q	1	N	1	K	1	M	0.7875	T	0.5625	Y	1	N	1	Y	0.5625	Q	1	D	0.7875	N	1	K	1	0.154524	0.902954	0.139528
Bos taurus	T	1	Q	1	E	0.7875	K	1	H	1	E	1	E	1	D	1	Y	1	Q	1	N	1	K	1	M	0.7875	T	0.5625	Y	1	N	1	Y	0.5625	Q	1	D	0.7875	N	1	K	1	0.154524	0.902954	0.139528
Odocoileus virginianus	T	1	Q	1	E	0.7875	K	1	H	1	E	1	E	1	D	1	Y	1	Q	1	N	1	K	1	M	0.7875	T	0.5625	Y	1	N	1	H	0.5625	Q	1	D	0.7875	N	1	K	1	0.154524	0.890295	0.137572
Panthera tigris	T	1	L	0.45	E	0.7875	K	1	H	1	E	1	E	1	E	0.7875	Y	1	Q	1	N	1	K	1	L	1	T	0.5625	Y	1	N	1	N	1	Q	1	E	1	N	1	K	1	0.156977	0.814346	0.127834
Urocitellus parryii	T	1	L	0.45	D	1	K	1	Q	0.675	E	1	E	1	D	1	H	0.675	Q	1	N	1	K	1	L	1	D	0.5625	Y	1	N	1	N	1	Q	1	E	1	N	1	K	1	0.11533	0.907173	0.104624
Puma concolor	T	1	L	0.45	E	0.7875	K	1	H	1	E	1	E	1	E	0.7875	Y	1	Q	1	N	1	K	1	L	1	T	0.5625	Y	1	N	1	N	1	Q	1	E	1	N	1	K	1	0.156977	0.611814	0.0960408
Mesocricetus auratus	I	0.3375	Q	1	D	1	K	1	Q	0.675	E	1	E	1	D	1	Y	1	Q	1	N	1	K	1	L	1	N	0.5625	Y	1	N	1	Y	0.5625	Q	1	E	1	N	1	K	1	0.0720813	0.890295	0.0641736
Vicugna pacos	T	1	L	0.45	K	0.5625	E	0.675	H	1	E	1	E	1	D	1	Y	1	Q	1	N	1	K	1	A	0.675	I	0.7875	Y	1	N	1	N	1	Q	1	D	0.7875	N	1	K	1	0.0715227	0.894515	0.0639781
Acinonyx jubatus	T	1	L	0.45	E	0.7875	K	1	H	1	E	1	E	1	E	0.7875	Y	1	Q	1	N	1	K	1	L	1	T	0.5625	Y	1	N	1	N	1	Q	1	E	1	K	0.45	K	1	0.0706397	0.898734	0.0634863
Physeter catodon	T	1	Q	1	Q	0.45	K	1	H	1	E	1	E	1	D	1	Y	1	Q	1	N	1	K	1	T	0.3375	T	0.5625	Y	1	N	1	N	1	Q	1	D	0.7875	N	1	K	1	0.0672759	0.907173	0.0610309
Heterocephalus glaber	T	1	Q	1	D	1	K	1	Q	0.675	E	1	E	1	D	1	Y	1	Q	1	N	1	L	0.5625	L	1	A	0.5625	Y	1	N	1	H	0.5625	Q	1	Q	0.5625	N	1	K	1	0.0675762	0.860759	0.0581668
Ursus arctos	T	1	L	0.45	E	0.7875	K	1	Y	0.675	E	1	E	1	D	1	Y	1	Q	1	N	1	K	1	H	0.45	T	0.5625	Y	1	N	1	N	1	Q	1	E	1	N	1	K	1	0.0605483	0.902954	0.0546723
Canis dingo	-	-	L	0.45	E	0.7875	K	1	Y	0.675	E	1	E	1	E	0.7875	Y	1	Q	1	N	1	K	1	L	1	T	0.5625	Y	1	D	0.5625	N	1	Q	1	E	1	N	1	K	1	0.0596022	0.902954	0.0538181
Canis familiaris	-	-	L	0.45	E	0.7875	K	1	Y	0.675	E	1	E	1	E	0.7875	Y	1	Q	1	N	1	K	1	L	1	T	0.5625	Y	1	D	0.5625	N	1	Q	1	E	1	N	1	K	1	0.0596022	0.902954	0.0538181
Vulpes vulpes	-	-	L	0.45	E	0.7875	K	1	Y	0.675	E	1	E	1	E	0.7875	Y	1	Q	1	N	1	K	1	L	1	T	0.5625	Y	1	D	0.5625	N	1	Q	1	E	1	N	1	K	1	0.0596022	0.902954	0.0538181
Peromyscus leucopus	I	0.3375	Q	1	D	1	K	1	Q	0.675	E	1	E	1	D	1	Y	1	Q	1	N	1	K	1	L	1	N	0.5625	Y	1	N	1	P	0.45	Q	1	E	1	N	1	K	1	0.057665	0.907173	0.0523122
Balaenoptera acutorostrata	T	1	Q	1	Q	0.45	K	1	H	1	E	1	E	1	D	1	Y	1	R	0.5625	N	1	K	1	I	0.9	T	0.5625	Y	1	N	1	N	1	Q	1	V	0.45	N	1	K	1	0.057665	0.902954	0.0520689
Equus caballus	T	1	L	0.45	E	0.7875	K	1	S	0.45	E	1	E	1	E	0.7875	H	0.675	Q	1	N	1	R	0.9	L	1	T	0.5625	Y	1	N	1	N	1	Q	1	E	1	N	1	K	1	0.0429136	0.873418	0.0374815
Camelus dromedarius	T	1	L	0.45	E	0.7875	E	0.675	H	1	E	1	E	1	D	1	Y	1	Q	1	N	1	K	1	T	0.3375	T	0.5625	Y	1	N	1	N	1	Q	1	D	0.7875	N	1	K	1	0.0357613	0.890295	0.0318381
Camelus ferus	T	1	L	0.45	E	0.7875	E	0.675	H	1	E	1	E	1	D	1	Y	1	Q	1	N	1	K	1	T	0.3375	T	0.5625	Y	1	N	1	N	1	Q	1	D	0.7875	N	1	K	1	0.0357613	0.890295	0.0318381
Manis javanica	T	1	E	0.5625	E	0.7875	K	1	S	0.45	E	1	E	1	E	0.7875	Y	1	Q	1	N	1	K	1	I	0.9	N	0.5625	Y	1	N	1	K	0.45	Q	1	E	1	N	1	K	1	0.0357613	0.877637	0.0313855
Microcebus murinus	T	1	Q	1	E	0.7875	N	0.45	N	0.5625	E	1	E	1	D	1	H	0.675	Q	1	N	1	K	1	L	1	T	0.5625	Y	1	N	1	N	1	Q	1	E	1	K	0.45	K	1	0.0340584	0.886076	0.0301783
Phoca vitulina	T	1	L	0.45	E	0.7875	K	1	Y	0.675	E	1	E	1	E	0.7875	Y	1	Q	1	N	1	K	1	Q	0.45	T	0.5625	Y	1	D	0.5625	N	1	Q	1	E	1	N	1	K	1	0.026821	0.898734	0.0241049
Microtus ochrogaster	I	0.3375	D	0.45	D	1	K	1	Q	0.675	E	1	E	1	D	1	Y	1	Q	1	N	1	K	1	L	1	S	0.45	Y	1	N	1	H	0.5625	Q	1	E	1	N	1	K	1	0.0259493	0.890295	0.0231025
Cricetulus griseus	I	0.3375	Q	1	D	1	K	1	Q	0.675	E	1	E	1	D	1	Y	1	Q	1	N	1	K	1	L	1	N	0.5625	Y	1	N	1	H	0.5625	Q	1	G	0.3375	N	1	K	1	0.0243274	0.907173	0.0220692
Carlito syrichta	T	1	Q	1	D	1	K	1	Q	0.675	E	1	E	1	D	1	H	0.675	Q	1	N	1	I	0.5625	I	0.9	S	0.45	Y	1	N	1	N	1	Q	1	V	0.45	N	1	N	0.45	0.0210189	0.907173	0.0190678
Lagenorhynchus obliquidens	A	0.3375	R	0.5625	Q	0.45	K	1	R	0.5625	E	1	E	1	D	1	Y	1	Q	1	N	1	K	1	I	0.9	T	0.5625	Y	1	N	1	N	1	Q	1	D	0.7875	N	1	K	1	0.0191579	0.907173	0.0173795
Globicephala melas	A	0.3375	R	0.5625	Q	0.45	K	1	R	0.5625	E	1	E	1	D	1	Y	1	Q	1	N	1	K	1	I	0.9	T	0.5625	Y	1	N	1	N	1	Q	1	D	0.7875	N	1	K	1	0.0191579	0.902954	0.0172987
Loxodonta africana	T	1	L	0.45	D	1	T	0.45	Q	0.675	E	1	E	1	D	1	Y	1	Q	1	N	1	R	0.9	L	1	D	0.5625	F	0.7875	S	0.7875	P	0.45	Q	1	E	1	N	1	K	1	0.0193111	0.894515	0.0172741
Eumetopias jubatus	T	1	L	0.45	E	0.7875	K	1	S	0.45	E	1	E	1	E	0.7875	Y	1	Q	1	N	1	K	1	Q	0.45	T	0.5625	Y	1	D	0.5625	N	1	Q	1	E	1	N	1	K	1	0.0178807	0.902954	0.0161454
Orcinus orca	A	0.3375	R	0.5625	Q	0.45	K	1	R	0.5625	E	1	E	1	D	1	Y	1	Q	1	N	1	K	1	I	0.9	T	0.5625	Y	1	N	1	N	1	Q	1	D	0.7875	N	1	K	1	0.0191579	0.8397	0.0160869
Callorhinus ursinus	T	1	L	0.45	E	0.7875	K	1	S	0.45	E	1	E	1	E	0.7875	Y	1	Q	1	N	1	K	1	Q	0.45	T	0.5625	Y	1	D	0.5625	N	1	Q	1	E	1	N	1	K	1	0.0178807	0.898734	0.01607
Otolemur garnettii	T	1	Q	1	D	1	N	0.45	R	0.5625	E	1	E	1	E	0.7875	H	0.675	Q	1	N	1	K	1	I	0.9	T	0.5625	Y	1	N	1	E	0.45	Q	1	Q	0.5625	N	1	K	1	0.0172421	0.915612	0.015787
Octodon degus	T	1	Q	1	D	1	N	0.45	Q	0.675	K	0.675	E	1	D	1	Y	1	Q	1	N	1	V	0.45	L	1	A	0.5625	Y	1	N	1	H	0.5625	Q	1	Q	0.5625	N	1	K	1	0.016421	0.902954	0.0148274
Pteropus alecto	T	1	L	0.45	E	0.7875	K	1	T	0.5625	E	1	E	1	D	1	Y	1	Q	1	N	1	K	1	L	1	A	0.5625	Y	1	D	0.5625	N	1	E	0.5625	E	1	K	0.45	K	1	0.0159649	0.915612	0.0146176
Pteropus vampyrus	T	1	L	0.45	E	0.7875	K	1	T	0.5625	E	1	E	1	D	1	Y	1	Q	1	N	1	K	1	L	1	A	0.5625	Y	1	D	0.5625	N	1	E	0.5625	E	1	K	0.45	K	1	0.0159649	0.915612	0.0146176
Zalophus californianus	T	1	L	0.45	E	0.7875	K	1	S	0.45	E	1	E	1	E	0.7875	Y	1	Q	1	N	1	K	1	Q	0.45	T	0.5625	Y	1	D	0.5625	N	1	Q	1	D	0.7875	N	1	K	1	0.014081	0.902954	0.0127145
Mustela erminea	T	1	L	0.45	E	0.7875	K	1	Y	0.675	E	1	E	1	E	0.7875	Y	1	Q	1	N	1	K	1	H	0.45	T	0.5625	Y	1	D	0.5625	N	1	E	0.5625	Q	0.5625	N	1	K	1	0.00848633	0.881857	0.00748373
Mustela putorius	T	1	L	0.45	E	0.7875	K	1	Y	0.675	E	1	E	1	E	0.7875	Y	1	Q	1	N	1	K	1	H	0.45	T	0.5625	Y	1	D	0.5625	N	1	E	0.5625	Q	0.5625	N	1	K	1	0.00848633	0.881857	0.00748373
Suricata suricatta	T	1	L	0.45	E	0.7875	Q	0.5625	H	1	E	1	Q	0.5625	E	0.7875	Y	1	L	0.45	N	1	K	1	R	0.5625	A	0.5625	Y	1	N	1	S	0.7875	Q	1	D	0.7875	N	1	K	1	0.00779682	0.898734	0.00700727
Phyllostomus discolor	P	0.45	D	0.45	E	0.7875	N	0.45	N	0.5625	E	1	E	1	E	0.7875	Y	1	Q	1	N	1	R	0.9	L	1	N	0.5625	Y	1	D	0.5625	N	1	Q	1	D	0.7875	N	1	K	1	0.00712852	0.894515	0.00637657
Lontra canadensis	T	1	L	0.45	E	0.7875	K	1	Y	0.675	E	1	E	1	E	0.7875	Y	1	Q	1	N	1	K	1	N	0.3375	T	0.5625	Y	1	D	0.5625	N	1	E	0.5625	Q	0.5625	N	1	K	1	0.00636475	0.890295	0.0056665
Vombatus ursinus	S	0.7875	R	0.5625	E	0.7875	T	0.45	K	0.5625	E	1	E	1	E	0.7875	Y	1	Q	1	N	1	R	0.9	I	0.9	T	0.5625	F	0.7875	D	0.5625	N	1	E	0.5625	K	0.675	N	1	K	1	0.00532864	0.85654	0.00456419
Rhinolophus ferrumequinum	T	1	L	0.45	D	1	D	0.5625	S	0.45	E	1	E	1	N	0.5625	H	0.675	Q	1	N	1	K	1	L	1	N	0.5625	F	0.7875	N	1	N	1	E	0.5625	N	0.45	N	1	K	1	0.00484933	0.919831	0.00446057
Tupaia chinensis	T	1	E	0.5625	N	0.5625	K	1	I	0.45	E	1	E	1	E	0.7875	H	0.675	Q	1	N	1	K	1	Q	0.45	R	0.675	Y	1	D	0.5625	N	1	Q	1	D	0.7875	K	0.45	K	1	0.00458262	0.793249	0.00363516
Mastomys coucha	L	0.3375	N	0.7875	N	0.5625	K	1	Q	0.675	E	1	E	1	D	1	Y	1	Q	1	N	1	K	1	I	0.9	N	0.5625	F	0.7875	T	0.9	H	0.5625	Q	1	A	0.3375	N	1	H	0.5625	0.00386659	0.877637	0.00339346
Desmodus rotundus	P	0.45	E	0.5625	E	0.7875	N	0.45	T	0.5625	E	1	E	1	E	0.7875	Y	1	Q	1	N	1	M	0.675	I	0.9	T	0.5625	Y	1	D	0.5625	S	0.7875	Q	1	D	0.7875	N	1	N	0.45	0.00213146	0.915612	0.00195159
Rattus norvegicus	L	0.3375	K	0.5625	N	0.5625	K	1	Q	0.675	E	1	E	1	D	1	Y	1	Q	1	N	1	K	1	I	0.9	N	0.5625	F	0.7875	N	1	Q	0.7875	P	0.3375	T	0.45	N	1	H	0.5625	0.00193329	0.898734	0.00173752
Grammomys surdaster	L	0.3375	E	0.5625	D	1	K	1	Q	0.675	E	1	E	1	D	1	Y	1	Q	1	N	1	K	1	T	0.3375	N	0.5625	F	0.7875	T	0.9	Y	0.5625	Q	1	A	0.3375	N	1	H	0.5625	0.00184123	0.907173	0.00167032
Empidonax traillii	N	0.9	Q	1	E	0.7875	Q	0.5625	R	0.5625	M	0.675	E	1	D	1	Y	1	E	0.5625	N	1	K	1	N	0.3375	G	0.5625	F	0.7875	D	0.5625	S	0.7875	E	0.5625	K	0.675	N	1	K	1	0.00214097	0.772152	0.00165315
Serinus canaria	D	0.5625	Q	1	D	1	E	0.675	R	0.5625	R	0.675	E	1	D	1	Y	1	E	0.5625	N	1	R	0.9	N	0.3375	K	0.675	F	0.7875	D	0.5625	N	1	E	0.5625	N	0.45	N	1	K	1	0.00186425	0.780591	0.00145521
Nothoprocta perdicaria	D	0.5625	E	0.5625	D	1	E	0.675	I	0.45	K	0.675	E	1	D	1	Y	1	E	0.5625	N	1	K	1	N	0.3375	K	0.675	F	0.7875	N	1	N	1	E	0.5625	N	0.45	N	1	K	1	0.00165711	0.793249	0.0013145
Echinops telfairi	T	1	Q	1	T	0.5625	T	0.45	N	0.5625	E	1	E	1	N	0.5625	Y	1	Q	1	N	1	M	0.675	L	1	K	0.675	F	0.7875	D	0.5625	P	0.45	Q	1	D	0.7875	K	0.45	L	0.5625	0.00144997	0.902954	0.00130926
Ornithorhynchus anatinus	-	-	E	0.5625	T	0.5625	Q	0.5625	K	0.5625	Q	0.5625	E	1	D	1	Y	1	Q	1	N	1	K	1	N	0.3375	K	0.675	F	0.7875	D	0.5625	N	1	E	0.5625	N	0.45	N	1	K	1	0.00143846	0.873418	0.00125638
Myotis lucifugus	S	0.7875	K	0.5625	E	0.7875	N	0.45	S	0.45	K	0.675	E	1	D	1	H	0.675	E	0.5625	N	1	K	1	L	1	T	0.5625	Y	1	N	1	S	0.7875	P	0.3375	N	0.45	N	1	K	1	0.00121797	0.890295	0.00108436
Corvus moneduloides	D	0.5625	Q	1	E	0.7875	E	0.675	R	0.5625	R	0.675	E	1	N	0.5625	Y	1	E	0.5625	N	1	K	1	N	0.3375	S	0.45	F	0.7875	D	0.5625	N	1	E	0.5625	E	1	N	1	K	1	0.00135935	0.776371	0.00105536
Rattus rattus	L	0.3375	K	0.5625	N	0.5625	K	1	Q	0.675	E	1	E	1	D	1	Y	1	Q	1	N	1	K	1	I	0.9	N	0.5625	F	0.7875	D	0.5625	Q	0.7875	P	0.3375	T	0.45	N	1	H	0.5625	0.00108748	0.894515	0.000972765
Dromaius novaehollandiae	N	0.9	Q	1	T	0.5625	E	0.675	I	0.45	K	0.675	E	1	D	1	Y	1	E	0.5625	N	1	K	1	N	0.3375	N	0.5625	F	0.7875	D	0.5625	N	1	E	0.5625	N	0.45	N	1	K	1	0.00124283	0.772152	0.000959654
Taeniopygia guttata	D	0.5625	Q	1	E	0.7875	E	0.675	R	0.5625	R	0.675	E	1	N	0.5625	Y	1	E	0.5625	N	1	R	0.9	N	0.3375	T	0.5625	F	0.7875	D	0.5625	N	1	D	0.45	E	1	N	1	K	1	0.00122341	0.780591	0.000954984
Cyanistes caeruleus	N	0.9	E	0.5625	E	0.7875	E	0.675	R	0.5625	R	0.675	E	1	D	1	Y	1	E	0.5625	N	1	K	1	N	0.3375	N	0.5625	F	0.7875	D	0.5625	P	0.45	E	0.5625	E	1	N	1	K	1	0.00122341	0.776371	0.000949821
Corvus cornix	D	0.5625	Q	1	E	0.7875	E	0.675	R	0.5625	R	0.675	E	1	N	0.5625	Y	1	E	0.5625	N	1	K	1	N	0.3375	S	0.45	F	0.7875	D	0.5625	N	1	E	0.5625	E	1	N	1	R	0.9	0.00122341	0.776371	0.000949821
Neopelma chrysocephalum	N	0.9	Q	1	E	0.7875	Q	0.5625	R	0.5625	M	0.675	E	1	D	1	Y	1	E	0.5625	D	0.5625	K	1	N	0.3375	S	0.45	F	0.7875	D	0.5625	S	0.7875	E	0.5625	R	0.675	N	1	K	1	0.000963437	0.780591	0.00075205
Zonotrichia albicollis	D	0.5625	Q	1	V	0.5625	E	0.675	R	0.5625	R	0.675	E	1	D	1	Y	1	E	0.5625	N	1	R	0.9	N	0.3375	K	0.675	F	0.7875	D	0.5625	S	0.7875	E	0.5625	N	0.45	N	1	K	1	0.000825803	0.776371	0.000641129
Camarhynchus parvulus	D	0.5625	Q	1	E	0.7875	E	0.675	M	0.675	R	0.675	E	1	D	1	Y	1	E	0.5625	N	1	R	0.9	N	0.3375	K	0.675	F	0.7875	D	0.5625	K	0.45	E	0.5625	N	0.45	N	1	K	1	0.000792771	0.780591	0.00061883
Tyto alba	D	0.5625	Q	1	E	0.7875	E	0.675	R	0.5625	R	0.675	E	1	D	1	Y	1	E	0.5625	N	1	K	1	N	0.3375	R	0.675	F	0.7875	D	0.5625	K	0.45	E	0.5625	N	0.45	N	1	K	1	0.000734047	0.776371	0.000569893
Anas platyrhynchos	D	0.5625	Q	1	A	0.45	E	0.675	V	0.3375	R	0.675	E	1	D	1	Y	1	E	0.5625	N	1	K	1	N	0.3375	N	0.5625	F	0.7875	D	0.5625	N	1	E	0.5625	K	0.675	N	1	K	1	0.000699092	0.772152	0.000539806
Mus musculus	L	0.3375	N	0.7875	N	0.5625	N	0.45	Q	0.675	E	1	E	1	D	1	Y	1	Q	1	N	1	K	1	T	0.3375	S	0.45	F	0.7875	T	0.9	H	0.5625	Q	1	A	0.3375	N	1	H	0.5625	0.000521989	0.902954	0.000471332
Lonchura striata	D	0.5625	Q	1	E	0.7875	E	0.675	R	0.5625	R	0.675	E	1	N	0.5625	Y	1	E	0.5625	N	1	R	0.9	N	0.3375	T	0.5625	F	0.7875	D	0.5625	K	0.45	D	0.45	E	1	N	1	K	1	0.000550535	0.780591	0.000429743
Corapipo altera	N	0.9	Q	1	E	0.7875	Q	0.5625	R	0.5625	M	0.675	E	1	N	0.5625	Y	1	E	0.5625	N	1	K	1	N	0.3375	S	0.45	F	0.7875	D	0.5625	N	1	E	0.5625	T	0.45	N	1	L	0.5625	0.000458779	0.772152	0.000354247
Apteryx rowi	D	0.5625	Q	1	T	0.5625	E	0.675	I	0.45	K	0.675	E	1	D	1	Y	1	E	0.5625	N	1	K	1	N	0.3375	N	0.5625	F	0.7875	D	0.5625	N	1	E	0.5625	N	0.45	Y	0.5625	K	1	0.000436933	0.776371	0.000339222
Manacus vitellinus	N	0.9	Q	1	E	0.7875	Q	0.5625	R	0.5625	M	0.675	E	1	N	0.5625	Y	1	E	0.5625	N	1	K	1	N	0.3375	S	0.45	F	0.7875	D	0.5625	N	1	E	0.5625	T	0.45	N	1	N	0.45	0.000367024	0.772152	0.000283398
Pipra filicauda	N	0.9	Q	1	E	0.7875	Q	0.5625	R	0.5625	M	0.675	E	1	N	0.5625	Y	1	E	0.5625	N	1	K	1	N	0.3375	S	0.45	F	0.7875	D	0.5625	N	1	E	0.5625	T	0.45	N	1	N	0.45	0.000367024	0.772152	0.000283398
Athene cunicularia	D	0.5625	Q	1	E	0.7875	E	0.675	R	0.5625	R	0.675	E	1	D	1	Y	1	E	0.5625	N	1	K	1	N	0.3375	S	0.45	F	0.7875	D	0.5625	K	0.45	E	0.5625	N	0.45	N	1	K	1	0.000489365	0.556962	0.000272558
Strigops habroptila	D	0.5625	Q	1	E	0.7875	E	0.675	R	0.5625	R	0.675	E	1	N	0.5625	Y	1	E	0.5625	N	1	K	1	N	0.3375	T	0.5625	F	0.7875	D	0.5625	E	0.45	E	0.5625	N	0.45	N	1	K	1	0.000344085	0.767932	0.000264234
Gallus gallus	D	0.5625	E	0.5625	A	0.45	E	0.675	V	0.3375	R	0.675	E	1	D	1	Y	1	E	0.5625	N	1	K	1	N	0.3375	R	0.675	F	0.7875	D	0.5625	N	1	E	0.5625	T	0.45	N	1	K	1	0.000314592	0.767932	0.000241585
Numida meleagris	D	0.5625	E	0.5625	A	0.45	E	0.675	V	0.3375	R	0.675	E	1	D	1	Y	1	E	0.5625	N	1	K	1	N	0.3375	R	0.675	F	0.7875	D	0.5625	N	1	E	0.5625	T	0.45	N	1	K	1	0.000314592	0.759494	0.00023893
Calypte anna	D	0.5625	Q	1	E	0.7875	E	0.675	R	0.5625	R	0.675	E	1	D	1	H	0.675	E	0.5625	N	1	K	1	N	0.3375	S	0.45	F	0.7875	D	0.5625	K	0.45	D	0.45	N	0.45	N	1	K	1	0.000264257	0.772152	0.000204047
Rhinatrema bivittatum	-	-	Q	1	R	0.5625	Q	0.5625	Q	0.675	Q	0.5625	E	1	D	1	H	0.675	E	0.5625	N	1	R	0.9	N	0.3375	R	0.675	Y	1	E	0.45	R	0.45	P	0.3375	T	0.45	N	1	K	1	0.000287627	0.586498	0.000168692
Aquila chrysaetos	D	0.5625	Q	1	E	0.7875	E	0.675	R	0.5625	R	0.675	E	1	N	0.5625	Y	1	E	0.5625	N	1	K	1	N	0.3375	S	0.45	F	0.7875	D	0.5625	A	0.3375	E	0.5625	N	0.45	N	1	K	1	0.000206451	0.780591	0.000161154
Falco cherrug	D	0.5625	E	0.5625	E	0.7875	E	0.675	R	0.5625	R	0.675	E	1	N	0.5625	Y	1	E	0.5625	N	1	K	1	N	0.3375	S	0.45	F	0.7875	D	0.5625	K	0.45	E	0.5625	N	0.45	N	1	K	1	0.000154838	0.776371	0.000120212
Protobothrops mucrosquamatus	V	0.45	A	0.225	K	0.5625	Q	0.5625	A	0.225	R	0.675	D	0.7875	D	1	Y	1	N	0.7875	N	1	I	0.5625	N	0.3375	M	1	F	0.7875	N	1	N	1	E	0.5625	K	0.675	N	1	K	1	0.000171278	0.64135	0.000109849
Pseudonaja textilis	E	0.45	A	0.225	K	0.5625	Q	0.5625	I	0.45	R	0.675	V	0.45	D	1	Y	1	N	0.7875	N	1	I	0.5625	N	0.3375	I	0.7875	F	0.7875	N	1	N	1	E	0.5625	K	0.675	N	1	K	1	0.00015415	0.654008	0.000100815
Coturnix japonica	D	0.5625	E	0.5625	A	0.45	E	0.675	V	0.3375	R	0.675	E	1	D	1	Y	1	E	0.5625	N	1	K	1	N	0.3375	R	0.675	F	0.7875	D	0.5625	N	1	A	0.225	T	0.45	N	1	K	1	0.000125837	0.776371	9.76959e-05
Meleagris gallopavo	D	0.5625	E	0.5625	A	0.45	E	0.675	V	0.3375	R	0.675	E	1	D	1	Y	1	E	0.5625	N	1	K	1	N	0.3375	R	0.675	F	0.7875	D	0.5625	N	1	A	0.225	T	0.45	N	1	K	1	0.000125837	0.776371	9.76959e-05
Catharus ustulatus	D	0.5625	E	0.5625	E	0.7875	E	0.675	S	0.45	R	0.675	E	1	N	0.5625	Y	1	E	0.5625	N	1	K	1	N	0.3375	K	0.675	F	0.7875	D	0.5625	H	0.5625	E	0.5625	N	0.45	N	1	N	0.45	0.000104516	0.793249	8.2907e-05
Phasianus colchicus	D	0.5625	E	0.5625	A	0.45	E	0.675	A	0.225	R	0.675	E	1	D	1	Y	1	E	0.5625	N	1	K	1	N	0.3375	R	0.675	F	0.7875	D	0.5625	N	1	A	0.225	T	0.45	N	1	K	1	8.38911e-05	0.776371	6.51306e-05
Microcaecilia unicolor	-	-	E	0.5625	S	0.45	Q	0.5625	R	0.5625	L	0.5625	E	1	D	1	N	0.5625	E	0.5625	N	1	I	0.5625	N	0.3375	R	0.675	Y	1	D	0.5625	K	0.45	P	0.3375	T	0.45	N	1	K	1	7.02213e-05	0.590717	4.14809e-05
Python bivittatus	V	0.45	A	0.225	M	0.5625	Q	0.5625	V	0.3375	R	0.675	D	0.7875	D	1	Y	1	D	0.45	N	1	V	0.45	N	0.3375	K	0.675	F	0.7875	D	0.5625	N	1	E	0.5625	K	0.675	N	1	K	1	4.45934e-05	0.658228	2.93526e-05
Chrysemys picta	T	1	A	0.225	S	0.45	Q	0.5625	V	0.3375	R	0.675	E	1	D	1	Y	1	A	0.225	N	1	K	1	N	0.3375	K	0.675	Y	1	D	0.5625	K	0.45	E	0.5625	N	0.45	N	1	K	1	4.26113e-05	0.658228	2.8048e-05
Chelonia mydas	T	1	A	0.225	S	0.45	Q	0.5625	V	0.3375	R	0.675	E	1	D	1	Y	1	A	0.225	N	1	K	1	N	0.3375	K	0.675	Y	1	D	0.5625	E	0.45	E	0.5625	N	0.45	N	1	K	1	4.26113e-05	0.64557	2.75086e-05
Pelodiscus sinensis	I	0.3375	A	0.225	S	0.45	E	0.675	V	0.3375	Q	0.5625	E	1	D	1	Y	1	A	0.225	N	1	K	1	N	0.3375	K	0.675	Y	1	N	1	K	0.45	E	0.5625	K	0.675	N	1	K	1	3.83502e-05	0.662447	2.5405e-05
Gopherus evgoodei	T	1	A	0.225	S	0.45	Q	0.5625	V	0.3375	R	0.675	E	1	D	1	Y	1	A	0.225	N	1	K	1	N	0.3375	K	0.675	F	0.7875	D	0.5625	A	0.3375	E	0.5625	N	0.45	N	1	K	1	2.51673e-05	0.679325	1.70968e-05
Chelonoidis abingdonii	T	1	A	0.225	S	0.45	Q	0.5625	V	0.3375	R	0.675	E	1	D	1	Y	1	A	0.225	N	1	K	1	N	0.3375	K	0.675	F	0.7875	D	0.5625	A	0.3375	E	0.5625	N	0.45	N	1	K	1	2.51673e-05	0.666667	1.67782e-05
Pogona vitticeps	V	0.45	A	0.225	M	0.5625	E	0.675	A	0.225	Q	0.5625	E	1	N	0.5625	Y	1	E	0.5625	N	1	A	0.3375	T	0.3375	E	0.675	F	0.7875	N	1	E	0.45	E	0.5625	N	0.45	N	1	K	1	1.06175e-05	0.654008	6.94391e-06
Enhydra lutris	T	1	P	0.3375	E	0.7875	K	1	Y	0.675	E	1	E	1	E	0.7875	Y	1	Q	1	N	1	K	1	H	0.45	T	0.5625	Y	1	D	0.5625	N	1	E	0.5625	Q	0.5625	N	1	K	1	0.00636475	N/A
Marmota flaviventris	T	1	L	0.45	D	1	K	1	Q	0.675	E	1	E	1	D	1	Y	1	Q	1	N	1	K	1	L	1	A	0.5625	Y	1	N	1	N	1	Q	1	E	1	N	1	K	1	0.170859	N/A
Neomonachus schauinslandi	T	1	L	0.45	E	0.7875	K	1	Y	0.675	E	1	E	1	E	0.7875	Y	1	Q	1	N	1	K	1	Q	0.45	T	0.5625	Y	1	D	0.5625	N	1	Q	1	E	1	N	1	K	1	0.026821	N/A
Paguma larvata	T	1	L	0.45	E	0.7875	T	0.45	Y	0.675	E	1	Q	0.5625	E	0.7875	Y	1	Q	1	N	1	K	1	L	1	T	0.5625	Y	1	D	0.5625	N	1	Q	1	E	1	N	1	K	1	0.0150868	N/A
Rhinolophus sinicus	T	1	E	0.5625	D	1	K	1	T	0.5625	K	0.675	E	1	D	1	H	0.675	Q	1	N	1	K	1	L	1	N	0.5625	Y	1	N	1	N	1	E	0.5625	N	0.45	N	1	K	1	0.0205263	N/A
Eptesicus fuscus	T	1	N	0.7875	E	0.7875	N	0.45	S	0.45	E	1	E	1	D	1	H	0.675	E	0.5625	N	1	K	1	L	1	T	0.5625	Y	1	N	1	S	0.7875	P	0.3375	N	0.45	N	1	K	1	0.00320783	N/A
Trichechus manatus	T	1	L	0.45	D	1	T	0.45	Q	0.675	E	1	E	1	D	1	Y	1	Q	1	N	1	R	0.9	L	1	N	0.5625	F	0.7875	S	0.7875	S	0.7875	Q	1	E	1	N	1	K	1	0.0337945	N/A
Terrapene carolina	T	1	A	0.225	S	0.45	Q	0.5625	V	0.3375	R	0.675	E	1	D	1	Y	1	A	0.225	N	1	K	1	N	0.3375	K	0.675	Y	1	D	0.5625	E	0.45	E	0.5625	N	0.45	N	1	K	1	4.26113e-05	N/A
Thamnophis elegans	V	0.45	A	0.225	K	0.5625	Q	0.5625	A	0.225	R	0.675	D	0.7875	D	1	Y	1	A	0.225	N	1	I	0.5625	N	0.3375	M	1	Y	1	N	1	P	0.45	D	0.45	N	0.45	N	1	K	1	1.4914e-05	N/A
Melopsittacus undulatus	D	0.5625	Q	1	E	0.7875	E	0.675	R	0.5625	K	0.675	E	1	D	1	Y	1	D	0.45	N	1	K	1	N	0.3375	S	0.45	F	0.7875	D	0.5625	A	0.3375	E	0.5625	N	0.45	N	1	K	1	0.000293619	N/A
*- Not amino acid asigned to this position
**NA: Not available value

## Sheet: Hoja3
		20	24	30	31	34	35	37	38	41	42	53	68	79	82	83	90	322	325	329	330	353
Acinonyx jubatus	X1	T	L	E	K	H	E	E	E	Y	Q	N	K	L	T	Y	N	N	Q	E	K	K
Aotus nancymaae		T	Q	D	K	H	E	E	D	H	E	N	K	L	T	Y	N	N	Q	E	N	K
Balaenoptera acutorostrata scammoni		T	Q	Q	K	H	E	E	D	Y	R	N	K	I	T	Y	N	N	Q	V	N	K
Bos indicus x Bos taurus	X1	T	Q	E	K	H	E	E	D	Y	Q	N	K	M	T	Y	N	Y	Q	D	N	K
Bos taurus	X1	T	Q	E	K	H	E	E	D	Y	Q	N	K	M	T	Y	N	Y	Q	D	N	K
Callithrix jacchus	PREDICTED	T	Q	D	K	H	E	E	D	H	E	N	K	L	T	Y	N	N	Q	E	N	K
Callorhinus ursinus		T	L	E	K	S	E	E	E	Y	Q	N	K	Q	T	Y	D	N	Q	E	N	K
Camelus dromedarius		T	L	E	E	H	E	E	D	Y	Q	N	K	T	T	Y	N	N	Q	D	N	K
Camelus ferus		T	L	E	E	H	E	E	D	Y	Q	N	K	T	T	Y	N	N	Q	D	N	K
Canis lupus dingo	X1	-	L	E	K	Y	E	E	E	Y	Q	N	K	L	T	Y	D	N	Q	E	N	K
Canis lupus familiaris	X1	-	L	E	K	Y	E	E	E	Y	Q	N	K	L	T	Y	D	N	Q	E	N	K
Carlito syrichta		T	Q	D	K	Q	E	E	D	H	Q	N	I	I	S	Y	N	N	Q	V	N	N
Cricetulus griseus		I	Q	D	K	Q	E	E	D	Y	Q	N	K	L	N	Y	N	H	Q	G	N	K
Delphinapterus leucas		T	Q	Q	K	H	E	E	D	Y	Q	N	K	I	T	Y	N	N	Q	D	N	K
Desmodus rotundus	X1	P	E	E	N	T	E	E	E	Y	Q	N	M	I	T	Y	D	S	Q	D	N	N
Echinops telfairi		T	Q	T	T	N	E	E	N	Y	Q	N	M	L	K	F	D	P	Q	D	K	L
Enhydra lutris kenyoni	X1	T	P	E	K	Y	E	E	E	Y	Q	N	K	H	T	Y	D	N	E	Q	N	K
Eptesicus fuscus	X1	T	N	E	N	S	E	E	D	H	E	N	K	L	T	Y	N	S	P	N	N	K
Equus caballus		T	L	E	K	S	E	E	E	H	Q	N	R	L	T	Y	N	N	Q	E	N	K
Eumetopias jubatus		T	L	E	K	S	E	E	E	Y	Q	N	K	Q	T	Y	D	N	Q	E	N	K
Felis catus		T	L	E	K	H	E	E	E	Y	Q	N	K	L	T	Y	N	N	Q	E	N	K
Globicephala melas		A	R	Q	K	R	E	E	D	Y	Q	N	K	I	T	Y	N	N	Q	D	N	K
Gorilla gorilla gorilla		T	Q	D	K	H	E	E	D	Y	Q	N	K	L	M	Y	N	N	Q	E	N	K
Grammomys surdaster		L	E	D	K	Q	E	E	D	Y	Q	N	K	T	N	F	T	Y	Q	A	N	H
Heterocephalus glaber		T	Q	D	K	Q	E	E	D	Y	Q	N	L	L	A	Y	N	H	Q	Q	N	K
Hylobates moloch		T	Q	D	K	H	E	E	D	Y	Q	N	K	L	M	Y	N	N	Q	E	N	K
Ictidomys tridecemlineatus		T	L	D	K	Q	E	E	D	Y	Q	N	K	L	A	Y	N	N	Q	E	N	K
Lagenorhynchus obliquidens		A	R	Q	K	R	E	E	D	Y	Q	N	K	I	T	Y	N	N	Q	D	N	K
Lontra canadensis		T	L	E	K	Y	E	E	E	Y	Q	N	K	N	T	Y	D	N	E	Q	N	K
Loxodonta africana		T	L	D	T	Q	E	E	D	Y	Q	N	R	L	D	F	S	P	Q	E	N	K
Lynx canadensis		T	L	E	K	H	E	E	E	Y	Q	N	K	L	T	Y	N	N	Q	E	N	K
Macaca mulatta	X1	T	Q	D	K	H	E	E	D	Y	Q	N	K	L	M	Y	N	N	Q	E	N	K
Macaca nemestrina		T	Q	D	K	H	E	E	D	Y	Q	N	K	L	M	Y	N	N	Q	E	N	K
Manis javanica	Predicted	T	E	E	K	S	E	E	E	Y	Q	N	K	I	N	Y	N	K	Q	E	N	K
Marmota flaviventris		T	L	D	K	Q	E	E	D	Y	Q	N	K	L	A	Y	N	N	Q	E	N	K
Mastomys coucha		L	N	N	K	Q	E	E	D	Y	Q	N	K	I	N	F	T	H	Q	A	N	H
Mesocricetus auratus		I	Q	D	K	Q	E	E	D	Y	Q	N	K	L	N	Y	N	Y	Q	E	N	K
Microcebus murinus		T	Q	E	N	N	E	E	D	H	Q	N	K	L	T	Y	N	N	Q	E	K	K
Microtus ochrogaster		I	D	D	K	Q	E	E	D	Y	Q	N	K	L	S	Y	N	H	Q	E	N	K
Monodon monoceros		T	Q	Q	K	H	E	E	D	Y	Q	N	K	I	T	Y	N	N	Q	D	N	K
Mus musculus	transcript variant 2	L	N	N	N	Q	E	E	D	Y	Q	N	K	T	S	F	T	H	Q	A	N	H
Mustela erminea		T	L	E	K	Y	E	E	E	Y	Q	N	K	H	T	Y	D	N	E	Q	N	K
Mustela putorius furo		T	L	E	K	Y	E	E	E	Y	Q	N	K	H	T	Y	D	N	E	Q	N	K
Myotis lucifugus	X1	S	K	E	N	S	K	E	D	H	E	N	K	L	T	Y	N	S	P	N	N	K
Nannospalax galili		-	Q	D	K	Q	E	E	D	Y	Q	N	K	L	K	Y	D	Q	Q	E	N	K
Neomonachus schauinslandi	X1	T	L	E	K	Y	E	E	E	Y	Q	N	K	Q	T	Y	D	N	Q	E	N	K
Neophocaena asiaeorientalis asiaeorientalis		T	Q	Q	K	H	E	E	D	Y	Q	N	K	I	T	Y	N	N	Q	D	N	K
Nomascus leucogenys		T	Q	D	K	H	E	E	D	Y	Q	N	K	L	M	Y	N	N	Q	E	N	K
Octodon degus		T	Q	D	N	Q	K	E	D	Y	Q	N	V	L	A	Y	N	H	Q	Q	N	K
Odocoileus virginianus texanus		T	Q	E	K	H	E	E	D	Y	Q	N	K	M	T	Y	N	H	Q	D	N	K
Orcinus orca		A	R	Q	K	R	E	E	D	Y	Q	N	K	I	T	Y	N	N	Q	D	N	K
Ornithorhynchus anatinus		-	E	T	Q	K	Q	E	D	Y	Q	N	K	N	K	F	D	N	E	N	N	K
Otolemur garnettii		T	Q	D	N	R	E	E	E	H	Q	N	K	I	T	Y	N	E	Q	Q	N	K
Ovis aries		T	Q	E	K	H	E	E	D	Y	Q	N	K	M	T	Y	N	Y	Q	D	N	K
Paguma larvata		T	L	E	T	Y	E	Q	E	Y	Q	N	K	L	T	Y	D	N	Q	E	N	K
Pan paniscus	X1	T	Q	D	K	H	E	E	D	Y	Q	N	K	L	M	Y	N	N	Q	E	N	K
Pan troglodytes	X1	T	Q	D	K	H	E	E	D	Y	Q	N	K	L	M	Y	N	N	Q	E	N	K
Panthera pardus	Predicted, X1	T	L	E	K	H	E	E	E	Y	Q	N	K	L	T	Y	N	N	Q	E	N	K
Panthera tigris altaica	Predicted, partial	T	L	E	K	H	E	E	E	Y	Q	N	K	L	T	Y	N	N	Q	E	N	K
Papio anubis		T	Q	D	K	H	E	E	D	Y	Q	N	K	L	M	Y	N	N	Q	E	N	K
Peromyscus leucopus		I	Q	D	K	Q	E	E	D	Y	Q	N	K	L	N	Y	N	P	Q	E	N	K
Phoca vitulina		T	L	E	K	Y	E	E	E	Y	Q	N	K	Q	T	Y	D	N	Q	E	N	K
Phocoena sinus	X1	T	Q	Q	K	H	E	E	D	Y	Q	N	K	I	T	Y	N	N	Q	D	N	K
Phyllostomus discolor		P	D	E	N	N	E	E	E	Y	Q	N	R	L	N	Y	D	N	Q	D	N	K
Physeter catodon		T	Q	Q	K	H	E	E	D	Y	Q	N	K	T	T	Y	N	N	Q	D	N	K
Piliocolobus tephrosceles		T	Q	D	K	H	E	E	D	Y	Q	N	K	L	M	Y	N	N	Q	E	N	K
Pongo abelii		T	Q	D	K	H	E	E	D	Y	Q	N	K	L	M	Y	N	N	Q	E	N	K
Pteropus alecto		T	L	E	K	T	E	E	D	Y	Q	N	K	L	A	Y	D	N	E	E	K	K
Pteropus vampyrus		T	L	E	K	T	E	E	D	Y	Q	N	K	L	A	Y	D	N	E	E	K	K
Puma concolor		T	L	E	K	H	E	E	E	Y	Q	N	K	L	T	Y	N	N	Q	E	N	K
Rattus norvegicus		L	K	N	K	Q	E	E	D	Y	Q	N	K	I	N	F	N	Q	P	T	N	H
Rattus rattus		L	K	N	K	Q	E	E	D	Y	Q	N	K	I	N	F	D	Q	P	T	N	H
Rhinolophus ferrumequinum		T	L	D	D	S	E	E	N	H	Q	N	K	L	N	F	N	N	E	N	N	K
Rhinolophus sinicus		T	E	D	K	T	K	E	D	H	Q	N	K	L	N	Y	N	N	E	N	N	K
Rhinopithecus roxellana		T	Q	D	K	H	E	E	D	Y	Q	N	K	L	M	Y	N	N	R	E	N	K
Sapajus apella		T	Q	D	K	H	E	E	D	H	E	N	K	L	T	Y	N	N	Q	E	N	K
Suricata suricatta		T	L	E	Q	H	E	Q	E	Y	L	N	K	R	A	Y	N	S	Q	D	N	K
Theropithecus gelada		T	Q	D	K	H	E	E	D	Y	Q	N	K	L	M	Y	N	N	Q	E	N	K
Trichechus manatus latirostris		T	L	D	T	Q	E	E	D	Y	Q	N	R	L	N	F	S	S	Q	E	N	K
Tupaia chinensis		T	E	N	K	I	E	E	E	H	Q	N	K	Q	R	Y	D	N	Q	D	K	K
Urocitellus parryii	X1	T	L	D	K	Q	E	E	D	H	Q	N	K	L	D	Y	N	N	Q	E	N	K
Ursus arctos horribilis		T	L	E	K	Y	E	E	D	Y	Q	N	K	H	T	Y	N	N	Q	E	N	K
Vicugna pacos		T	L	K	E	H	E	E	D	Y	Q	N	K	A	I	Y	N	N	Q	D	N	K
Vombatus ursinus		S	R	E	T	K	E	E	E	Y	Q	N	R	I	T	F	D	N	E	K	N	K
Vulpes vulpes		-	L	E	K	Y	E	E	E	Y	Q	N	K	L	T	Y	D	N	Q	E	N	K
Zalophus californianus		T	L	E	K	S	E	E	E	Y	Q	N	K	Q	T	Y	D	N	Q	D	N	K
Anas platyrhynchos		D	Q	A	E	V	R	E	D	Y	E	N	K	N	N	F	D	N	E	K	N	K
Apteryx rowi		D	Q	T	E	I	K	E	D	Y	E	N	K	N	N	F	D	N	E	N	Y	K
Aquila chrysaetos chrysaetos		D	Q	E	E	R	R	E	N	Y	E	N	K	N	S	F	D	A	E	N	N	K
Athene cunicularia		D	Q	E	E	R	R	E	D	Y	E	N	K	N	S	F	D	K	E	N	N	K
Calypte anna		D	Q	E	E	R	R	E	D	H	E	N	K	N	S	F	D	K	D	N	N	K
Camarhynchus parvulus		D	Q	E	E	M	R	E	D	Y	E	N	R	N	K	F	D	K	E	N	N	K
Catharus ustulatus		D	E	E	E	S	R	E	N	Y	E	N	K	N	K	F	D	H	E	N	N	N
Corapipo altera		N	Q	E	Q	R	M	E	N	Y	E	N	K	N	S	F	D	N	E	T	N	L
Corvus cornix cornix		D	Q	E	E	R	R	E	N	Y	E	N	K	N	S	F	D	N	E	E	N	R
Corvus moneduloides		D	Q	E	E	R	R	E	N	Y	E	N	K	N	S	F	D	N	E	E	N	K
Coturnix japonica		D	E	A	E	V	R	E	D	Y	E	N	K	N	R	F	D	N	A	T	N	K
Cyanistes caeruleus		N	E	E	E	R	R	E	D	Y	E	N	K	N	N	F	D	P	E	E	N	K
Dromaius novaehollandiae		N	Q	T	E	I	K	E	D	Y	E	N	K	N	N	F	D	N	E	N	N	K
Empidonax traillii		N	Q	E	Q	R	M	E	D	Y	E	N	K	N	G	F	D	S	E	K	N	K
Falco cherrug		D	E	E	E	R	R	E	N	Y	E	N	K	N	S	F	D	K	E	N	N	K
Gallus gallus		D	E	A	E	V	R	E	D	Y	E	N	K	N	R	F	D	N	E	T	N	K
Lonchura striata domestica		D	Q	E	E	R	R	E	N	Y	E	N	R	N	T	F	D	K	D	E	N	K
Manacus vitellinus		N	Q	E	Q	R	M	E	N	Y	E	N	K	N	S	F	D	N	E	T	N	N
Meleagris gallopavo		D	E	A	E	V	R	E	D	Y	E	N	K	N	R	F	D	N	A	T	N	K
Melopsittacus undulatus		D	Q	E	E	R	K	E	D	Y	D	N	K	N	S	F	D	A	E	N	N	K
Neopelma chrysocephalum		N	Q	E	Q	R	M	E	D	Y	E	D	K	N	S	F	D	S	E	R	N	K
Nothoprocta perdicaria		D	E	D	E	I	K	E	D	Y	E	N	K	N	K	F	N	N	E	N	N	K
Numida meleagris		D	E	A	E	V	R	E	D	Y	E	N	K	N	R	F	D	N	E	T	N	K
Phasianus colchicus		D	E	A	E	A	R	E	D	Y	E	N	K	N	R	F	D	N	A	T	N	K
Pipra filicauda		N	Q	E	Q	R	M	E	N	Y	E	N	K	N	S	F	D	N	E	T	N	N
Serinus canaria		D	Q	D	E	R	R	E	D	Y	E	N	R	N	K	F	D	N	E	N	N	K
Strigops habroptila		D	Q	E	E	R	R	E	N	Y	E	N	K	N	T	F	D	E	E	N	N	K
Taeniopygia guttata		D	Q	E	E	R	R	E	N	Y	E	N	R	N	T	F	D	N	D	E	N	K
Tyto alba alba		D	Q	E	E	R	R	E	D	Y	E	N	K	N	R	F	D	K	E	N	N	K
Zonotrichia albicollis		D	Q	V	E	R	R	E	D	Y	E	N	R	N	K	F	D	S	E	N	N	K
Chelonia mydas		T	A	S	Q	V	R	E	D	Y	A	N	K	N	K	Y	D	E	E	N	N	K
Chelonoidis abingdonii		T	A	S	Q	V	R	E	D	Y	A	N	K	N	K	F	D	A	E	N	N	K
Chrysemys picta bellii	X1	T	A	S	Q	V	R	E	D	Y	A	N	K	N	K	Y	D	K	E	N	N	K
Gopherus evgoodei		T	A	S	Q	V	R	E	D	Y	A	N	K	N	K	F	D	A	E	N	N	K
Pelodiscus sinensis		I	A	S	E	V	Q	E	D	Y	A	N	K	N	K	Y	N	K	E	K	N	K
Pogona vitticeps		V	A	M	E	A	Q	E	N	Y	E	N	A	T	E	F	N	E	E	N	N	K
Protobothrops mucrosquamatus		V	A	K	Q	A	R	D	D	Y	N	N	I	N	M	F	N	N	E	K	N	K
Pseudonaja textilis		E	A	K	Q	I	R	V	D	Y	N	N	I	N	I	F	N	N	E	K	N	K
Python bivittatus		V	A	M	Q	V	R	D	D	Y	D	N	V	N	K	F	D	N	E	K	N	K
Terrapene carolina triunguis		T	A	S	Q	V	R	E	D	Y	A	N	K	N	K	Y	D	E	E	N	N	K
Thamnophis elegans		V	A	K	Q	A	R	D	D	Y	A	N	I	N	M	Y	N	P	D	N	N	K
Microcaecilia unicolor		-	E	S	Q	R	L	E	D	N	E	N	I	N	R	Y	D	K	P	T	N	K
Rhinatrema bivittatum	X1	-	Q	R	Q	Q	Q	E	D	H	E	N	R	N	R	Y	E	R	P	T	N	K

## Sheet: Respaldo
Significant positions of amino acids that interact with S protein of SARS-CoV-2
Species		20	24	30	31	34	35	37	38	41	42	53	68	79	82	83	90	322	325	329	330	353		TMPRSS %similitud	3° modelo
Homo sapiens		T	Q	D	K	H	E	E	D	Y	Q	N	K	L	M	Y	N	N	Q	E	N	K
Macaca mulatta		1	1	1	1	1	1	1	1	1	1	1	1	1	1	1	1	1	1	1	1	1	1	0.907173	0.907173
Macaca nemestrina		1	1	1	1	1	1	1	1	1	1	1	1	1	1	1	1	1	1	1	1	1	1	0.907173	0.907173
Papio anubis		1	1	1	1	1	1	1	1	1	1	1	1	1	1	1	1	1	1	1	1	1	1	0.911392	0.911392
Theropithecus gelada		1	1	1	1	1	1	1	1	1	1	1	1	1	1	1	1	1	1	1	1	1	1	0.902954	0.902954
Gorilla gorilla gorilla		1	1	1	1	1	1	1	1	1	1	1	1	1	1	1	1	1	1	1	1	1	1	0.983122	0.983122
Pan paniscus		1	1	1	1	1	1	1	1	1	1	1	1	1	1	1	1	1	1	1	1	1	1	0.995781	0.995781
Pan troglodytes		1	1	1	1	1	1	1	1	1	1	1	1	1	1	1	1	1	1	1	1	1	1	1	1
Pongo abelii		1	1	1	1	1	1	1	1	1	1	1	1	1	1	1	1	1	1	1	1	1	1	0.953586	0.953586
Nomascus leucogenys		1	1	1	1	1	1	1	1	1	1	1	1	1	1	1	1	1	1	1	1	1	1	0.953586	0.953586
Hylobates moloch		1	1	1	1	1	1	1	1	1	1	1	1	1	1	1	1	1	1	1	1	1	1	0.962025	0.962025
Piliocolobus tephrosceles		1	1	1	1	1	1	1	1	1	1	1	1	1	1	1	1	1	1	1	1	1	1	0.92827	0.92827
Rhinopithecus roxellana		1	1	1	1	1	1	1	1	1	1	1	1	1	1	1	1	1	0.5625	1	1	1	0.5625	0.924051	0.519779
Sapajus apella		1	1	1	1	1	1	1	1	0.675	0.5625	1	1	1	0.5625	1	1	1	1	1	1	1	0.213574	0.915612	0.195551
Aotus nancymaae		1	1	1	1	1	1	1	1	0.675	0.5625	1	1	1	0.5625	1	1	1	1	1	1	1	0.213574	0.915612	0.195551
Nannospalax galili		-	1	1	1	0.675	1	1	1	1	1	1	1	1	0.675	1	0.5625	0.7875	1	1	1	1	0.201828	0.890295	0.179686
Delphinapterus leucas		1	1	0.45	1	1	1	1	1	1	1	1	1	0.9	0.5625	1	1	1	1	0.7875	1	1	0.179402	0.902954	0.161992
Monodon monoceros		1	1	0.45	1	1	1	1	1	1	1	1	1	0.9	0.5625	1	1	1	1	0.7875	1	1	0.179402	0.902954	0.161992
Phocoena sinus		1	1	0.45	1	1	1	1	1	1	1	1	1	0.9	0.5625	1	1	1	1	0.7875	1	1	0.179402	0.898734	0.161235
Neophocaena asiaeorientalis asiaeorientalis		1	1	0.45	1	1	1	1	1	1	1	1	1	0.9	0.5625	1	1	1	1	0.7875	1	1	0.179402	0.898734	0.161235
Ictidomys tridecemlineatus		1	0.45	1	1	0.675	1	1	1	1	1	1	1	1	0.5625	1	1	1	1	1	1	1	0.170859	0.902954	0.154278
Marmota flaviventris		1	0.45	1	1	0.675	1	1	1	1	1	1	1	1	0.5625	1	1	1	1	1	1	1	0.170859	N/A	#VALUE!
Felis catus		1	0.45	0.7875	1	1	1	1	0.7875	1	1	1	1	1	0.5625	1	1	1	1	1	1	1	0.156977	0.902954	0.141743
Puma concolor		1	0.45	0.7875	1	1	1	1	0.7875	1	1	1	1	1	0.5625	1	1	1	1	1	1	1	0.156977	0.611814	0.0960408
Lynx canadensis		1	0.45	0.7875	1	1	1	1	0.7875	1	1	1	1	1	0.5625	1	1	1	1	1	1	1	0.156977	0.898734	0.141081
Panthera tigris altaica		1	0.45	0.7875	1	1	1	1	0.7875	1	1	1	1	1	0.5625	1	1	1	1	1	1	1	0.156977	0.814346	0.127834
Panthera pardus		1	0.45	0.7875	1	1	1	1	0.7875	1	1	1	1	1	0.5625	1	1	1	1	1	1	1	0.156977	0.898734	0.141081
Odocoileus virginianus texanus		1	1	0.7875	1	1	1	1	1	1	1	1	1	0.7875	0.5625	1	1	0.5625	1	0.7875	1	1	0.154524	0.890295	0.137572
Bos taurus		1	1	0.7875	1	1	1	1	1	1	1	1	1	0.7875	0.5625	1	1	0.5625	1	0.7875	1	1	0.154524	0.902954	0.139528
Ovis aries		1	1	0.7875	1	1	1	1	1	1	1	1	1	0.7875	0.5625	1	1	0.5625	1	0.7875	1	1	0.154524	0.911392	0.140832
Bos indicus x Bos taurus		1	1	0.7875	1	1	1	1	1	1	1	1	1	0.7875	0.5625	1	1	0.5625	1	0.7875	1	1	0.154524	0.902954	0.139528
Urocitellus parryii		1	0.45	1	1	0.675	1	1	1	0.675	1	1	1	1	0.5625	1	1	1	1	1	1	1	0.11533	0.907173	0.104624
Mesocricetus auratus		0.3375	1	1	1	0.675	1	1	1	1	1	1	1	1	0.5625	1	1	0.5625	1	1	1	1	0.0720813	0.890295	0.0641736
Vicugna pacos		1	0.45	0.5625	0.675	1	1	1	1	1	1	1	1	0.675	0.7875	1	1	1	1	0.7875	1	1	0.0715227	0.894515	0.0639781
Acinonyx jubatus		1	0.45	0.7875	1	1	1	1	0.7875	1	1	1	1	1	0.5625	1	1	1	1	1	0.45	1	0.0706397	0.898734	0.0634863
Heterocephalus glaber		1	1	1	1	0.675	1	1	1	1	1	1	0.5625	1	0.5625	1	1	0.5625	1	0.5625	1	1	0.0675762	0.860759	0.0581668
Physeter catodon		1	1	0.45	1	1	1	1	1	1	1	1	1	0.3375	0.5625	1	1	1	1	0.7875	1	1	0.0672759	0.907173	0.0610309
Ursus arctos horribilis		1	0.45	0.7875	1	0.675	1	1	1	1	1	1	1	0.45	0.5625	1	1	1	1	1	1	1	0.0605483	0.902954	0.0546723
Canis lupus familiaris		-	0.45	0.7875	1	0.675	1	1	0.7875	1	1	1	1	1	0.5625	1	0.5625	1	1	1	1	1	0.0596022	0.902954	0.0538181
Vulpes vulpes		-	0.45	0.7875	1	0.675	1	1	0.7875	1	1	1	1	1	0.5625	1	0.5625	1	1	1	1	1	0.0596022	0.902954	0.0538181
Canis lupus dingo		-	0.45	0.7875	1	0.675	1	1	0.7875	1	1	1	1	1	0.5625	1	0.5625	1	1	1	1	1	0.0596022	0.902954	0.0538181
Peromyscus leucopus		0.3375	1	1	1	0.675	1	1	1	1	1	1	1	1	0.5625	1	1	0.45	1	1	1	1	0.057665	0.907173	0.0523122
Balaenoptera acutorostrata scammoni		1	1	0.45	1	1	1	1	1	1	0.5625	1	1	0.9	0.5625	1	1	1	1	0.45	1	1	0.057665	0.902954	0.0520689
Equus caballus		1	0.45	0.7875	1	0.45	1	1	0.7875	0.675	1	1	0.9	1	0.5625	1	1	1	1	1	1	1	0.0429136	0.873418	0.0374815
Camelus dromedarius		1	0.45	0.7875	0.675	1	1	1	1	1	1	1	1	0.3375	0.5625	1	1	1	1	0.7875	1	1	0.0357613	0.890295	0.0318381
Camelus ferus		1	0.45	0.7875	0.675	1	1	1	1	1	1	1	1	0.3375	0.5625	1	1	1	1	0.7875	1	1	0.0357613	0.890295	0.0318381
Manis javanica		1	0.5625	0.7875	1	0.45	1	1	0.7875	1	1	1	1	0.9	0.5625	1	1	0.45	1	1	1	1	0.0357613	0.877637	0.0313855
Microcebus murinus		1	1	0.7875	0.45	0.5625	1	1	1	0.675	1	1	1	1	0.5625	1	1	1	1	1	0.45	1	0.0340584	0.886076	0.0301783
Trichechus manatus latirostris		1	0.45	1	0.45	0.675	1	1	1	1	1	1	0.9	1	0.5625	0.7875	0.7875	0.7875	1	1	1	1	0.0337945	N/A	#VALUE!
Phoca vitulina		1	0.45	0.7875	1	0.675	1	1	0.7875	1	1	1	1	0.45	0.5625	1	0.5625	1	1	1	1	1	0.026821	0.898734	0.0241049
Neomonachus schauinslandi		1	0.45	0.7875	1	0.675	1	1	0.7875	1	1	1	1	0.45	0.5625	1	0.5625	1	1	1	1	1	0.026821	N/A	#VALUE!
Microtus ochrogaster		0.3375	0.45	1	1	0.675	1	1	1	1	1	1	1	1	0.45	1	1	0.5625	1	1	1	1	0.0259493	0.890295	0.0231025
Cricetulus griseus		0.3375	1	1	1	0.675	1	1	1	1	1	1	1	1	0.5625	1	1	0.5625	1	0.3375	1	1	0.0243274	0.907173	0.0220692
Carlito syrichta		1	1	1	1	0.675	1	1	1	0.675	1	1	0.5625	0.9	0.45	1	1	1	1	0.45	1	0.45	0.0210189	0.907173	0.0190678
Rhinolophus sinicus		1	0.5625	1	1	0.5625	0.675	1	1	0.675	1	1	1	1	0.5625	1	1	1	0.5625	0.45	1	1	0.0205263	N/A	#VALUE!
Loxodonta africana		1	0.45	1	0.45	0.675	1	1	1	1	1	1	0.9	1	0.5625	0.7875	0.7875	0.45	1	1	1	1	0.0193111	0.894515	0.0172741
Globicephala melas		0.3375	0.5625	0.45	1	0.5625	1	1	1	1	1	1	1	0.9	0.5625	1	1	1	1	0.7875	1	1	0.0191579	0.902954	0.0172987
Lagenorhynchus obliquidens		0.3375	0.5625	0.45	1	0.5625	1	1	1	1	1	1	1	0.9	0.5625	1	1	1	1	0.7875	1	1	0.0191579	0.907173	0.0173795
Callorhinus ursinus		1	0.45	0.7875	1	0.45	1	1	0.7875	1	1	1	1	0.45	0.5625	1	0.5625	1	1	1	1	1	0.0178807	0.898734	0.01607
Eumetopias jubatus		1	0.45	0.7875	1	0.45	1	1	0.7875	1	1	1	1	0.45	0.5625	1	0.5625	1	1	1	1	1	0.0178807	0.902954	0.0161454
Otolemur garnettii		1	1	1	0.45	0.5625	1	1	0.7875	0.675	1	1	1	0.9	0.5625	1	1	0.45	1	0.5625	1	1	0.0172421	0.915612	0.015787
Octodon degus		1	1	1	0.45	0.675	0.675	1	1	1	1	1	0.45	1	0.5625	1	1	0.5625	1	0.5625	1	1	0.016421	0.902954	0.0148274
Pteropus alecto		1	0.45	0.7875	1	0.5625	1	1	1	1	1	1	1	1	0.5625	1	0.5625	1	0.5625	1	0.45	1	0.0159649	0.915612	0.0146176
Pteropus vampyrus		1	0.45	0.7875	1	0.5625	1	1	1	1	1	1	1	1	0.5625	1	0.5625	1	0.5625	1	0.45	1	0.0159649	0.915612	0.0146176
Paguma larvata		1	0.45	0.7875	0.45	0.675	1	0.5625	0.7875	1	1	1	1	1	0.5625	1	0.5625	1	1	1	1	1	0.0150868	N/A	#VALUE!
Zalophus californianus		1	0.45	0.7875	1	0.45	1	1	0.7875	1	1	1	1	0.45	0.5625	1	0.5625	1	1	0.7875	1	1	0.014081	0.902954	0.0127145
Mustela putorius furo		1	0.45	0.7875	1	0.675	1	1	0.7875	1	1	1	1	0.45	0.5625	1	0.5625	1	0.5625	0.5625	1	1	0.00848633	0.881857	0.00748373
Mustela erminea		1	0.45	0.7875	1	0.675	1	1	0.7875	1	1	1	1	0.45	0.5625	1	0.5625	1	0.5625	0.5625	1	1	0.00848633	0.881857	0.00748373
Suricata suricatta		1	0.45	0.7875	0.5625	1	1	0.5625	0.7875	1	0.45	1	1	0.5625	0.5625	1	1	0.7875	1	0.7875	1	1	0.00779682	0.898734	0.00700727
Phyllostomus discolor		0.45	0.45	0.7875	0.45	0.5625	1	1	0.7875	1	1	1	0.9	1	0.5625	1	0.5625	1	1	0.7875	1	1	0.00712852	0.894515	0.00637657
Lontra canadensis		1	0.45	0.7875	1	0.675	1	1	0.7875	1	1	1	1	0.3375	0.5625	1	0.5625	1	0.5625	0.5625	1	1	0.00636475	0.890295	0.0056665
Enhydra lutris kenyoni		1	0.3375	0.7875	1	0.675	1	1	0.7875	1	1	1	1	0.45	0.5625	1	0.5625	1	0.5625	0.5625	1	1	0.00636475	N/A	#VALUE!
Vombatus ursinus		0.7875	0.5625	0.7875	0.45	0.5625	1	1	0.7875	1	1	1	0.9	0.9	0.5625	0.7875	0.5625	1	0.5625	0.675	1	1	0.00532864	0.85654	0.00456419
Rhinolophus ferrumequinum		1	0.45	1	0.5625	0.45	1	1	0.5625	0.675	1	1	1	1	0.5625	0.7875	1	1	0.5625	0.45	1	1	0.00484933	0.919831	0.00446057
Tupaia chinensis		1	0.5625	0.5625	1	0.45	1	1	0.7875	0.675	1	1	1	0.45	0.675	1	0.5625	1	1	0.7875	0.45	1	0.00458262	0.793249	0.00363516
Mastomys coucha		0.3375	0.7875	0.5625	1	0.675	1	1	1	1	1	1	1	0.9	0.5625	0.7875	0.9	0.5625	1	0.3375	1	0.5625	0.00386659	0.877637	0.00339346
Eptesicus fuscus		1	0.7875	0.7875	0.45	0.45	1	1	1	0.675	0.5625	1	1	1	0.5625	1	1	0.7875	0.3375	0.45	1	1	0.00320783	N/A	#VALUE!
Desmodus rotundus		0.45	0.5625	0.7875	0.45	0.5625	1	1	0.7875	1	1	1	0.675	0.9	0.5625	1	0.5625	0.7875	1	0.7875	1	0.45	0.00213146	0.915612	0.00195159
Rattus norvegicus		0.3375	0.5625	0.5625	1	0.675	1	1	1	1	1	1	1	0.9	0.5625	0.7875	1	0.7875	0.3375	0.45	1	0.5625	0.00193329	0.898734	0.00173752
Grammomys surdaster		0.3375	0.5625	1	1	0.675	1	1	1	1	1	1	1	0.3375	0.5625	0.7875	0.9	0.5625	1	0.3375	1	0.5625	0.00184123	0.907173	0.00167032
Echinops telfairi		1	1	0.5625	0.45	0.5625	1	1	0.5625	1	1	1	0.675	1	0.675	0.7875	0.5625	0.45	1	0.7875	0.45	0.5625	0.00144997	0.902954	0.00130926
Ornithorhynchus anatinus		-	0.5625	0.5625	0.5625	0.5625	0.5625	1	1	1	1	1	1	0.3375	0.675	0.7875	0.5625	1	0.5625	0.45	1	1	0.00143846	0.873418	0.00125638
Myotis lucifugus		0.7875	0.5625	0.7875	0.45	0.45	0.675	1	1	0.675	0.5625	1	1	1	0.5625	1	1	0.7875	0.3375	0.45	1	1	0.00121797	0.890295	0.00108436
Rattus rattus		0.3375	0.5625	0.5625	1	0.675	1	1	1	1	1	1	1	0.9	0.5625	0.7875	0.5625	0.7875	0.3375	0.45	1	0.5625	0.00108748	0.894515	0.000972765
Mus musculus		0.3375	0.7875	0.5625	0.45	0.675	1	1	1	1	1	1	1	0.3375	0.45	0.7875	0.9	0.5625	1	0.3375	1	0.5625	0.000521989	0.902954	0.000471332
Orcinus orca		0.3375	0.5625	0.45	1	0.5625	1	1	1	1	1	1	1	0.9	0.5625	1	1	1	1	0.7875	1	1	0.0191579
Callithrix jacchus		1	1	1	1	1	1	1	1	0.675	0.5625	1	1	1	0.5625	1	1	1	1	1	1	1	0.213574
Dromaius novaehollandiae		0.9	1	0.5625	0.675	0.45	0.675	1	1	1	0.5625	1	1	0.3375	0.5625	0.7875	0.5625	1	0.5625	0.45	1	1	0.00124283	0.772152	0.000959654
Anas platyrhynchos		0.5625	1	0.45	0.675	0.3375	0.675	1	1	1	0.5625	1	1	0.3375	0.5625	0.7875	0.5625	1	0.5625	0.675	1	1	0.000699092	0.772152	0.000539806
Numida meleagris		0.5625	0.5625	0.45	0.675	0.3375	0.675	1	1	1	0.5625	1	1	0.3375	0.675	0.7875	0.5625	1	0.5625	0.45	1	1	0.000314592	0.759494	0.00023893
Gallus gallus		0.5625	0.5625	0.45	0.675	0.3375	0.675	1	1	1	0.5625	1	1	0.3375	0.675	0.7875	0.5625	1	0.5625	0.45	1	1	0.000314592	0.767932	0.000241585
Phasianus colchicus		0.5625	0.5625	0.45	0.675	0.225	0.675	1	1	1	0.5625	1	1	0.3375	0.675	0.7875	0.5625	1	0.225	0.45	1	1	8.38911e-05	0.776371	6.51306e-05
Meleagris gallopavo		0.5625	0.5625	0.45	0.675	0.3375	0.675	1	1	1	0.5625	1	1	0.3375	0.675	0.7875	0.5625	1	0.225	0.45	1	1	0.000125837	0.776371	9.76959e-05
Serinus canaria		0.5625	1	1	0.675	0.5625	0.675	1	1	1	0.5625	1	0.9	0.3375	0.675	0.7875	0.5625	1	0.5625	0.45	1	1	0.00186425	0.780591	0.00145521
Calypte anna		0.5625	1	0.7875	0.675	0.5625	0.675	1	1	0.675	0.5625	1	1	0.3375	0.45	0.7875	0.5625	0.45	0.45	0.45	1	1	0.000264257	0.772152	0.000204047
Melopsittacus undulatus		0.5625	1	0.7875	0.675	0.5625	0.675	1	1	1	0.45	1	1	0.3375	0.45	0.7875	0.5625	0.3375	0.5625	0.45	1	1	0.000293619	N/A	#VALUE!
Nothoprocta perdicaria		0.5625	0.5625	1	0.675	0.45	0.675	1	1	1	0.5625	1	1	0.3375	0.675	0.7875	1	1	0.5625	0.45	1	1	0.00165711	0.793249	0.0013145
Zonotrichia albicollis		0.5625	1	0.5625	0.675	0.5625	0.675	1	1	1	0.5625	1	0.9	0.3375	0.675	0.7875	0.5625	0.7875	0.5625	0.45	1	1	0.000825803	0.776371	0.000641129
Taeniopygia guttata		0.5625	1	0.7875	0.675	0.5625	0.675	1	0.5625	1	0.5625	1	0.9	0.3375	0.5625	0.7875	0.5625	1	0.45	1	1	1	0.00122341	0.780591	0.000954984
Camarhynchus parvulus		0.5625	1	0.7875	0.675	0.675	0.675	1	1	1	0.5625	1	0.9	0.3375	0.675	0.7875	0.5625	0.45	0.5625	0.45	1	1	0.000792771	0.780591	0.00061883
Catharus ustulatus		0.5625	0.5625	0.7875	0.675	0.45	0.675	1	0.5625	1	0.5625	1	1	0.3375	0.675	0.7875	0.5625	0.5625	0.5625	0.45	1	0.45	0.000104516	0.793249	8.2907e-05
Coturnix japonica		0.5625	0.5625	0.45	0.675	0.3375	0.675	1	1	1	0.5625	1	1	0.3375	0.675	0.7875	0.5625	1	0.225	0.45	1	1	0.000125837	0.776371	9.76959e-05
Neopelma chrysocephalum		0.9	1	0.7875	0.5625	0.5625	0.675	1	1	1	0.5625	0.5625	1	0.3375	0.45	0.7875	0.5625	0.7875	0.5625	0.675	1	1	0.000963437	0.780591	0.00075205
Cyanistes caeruleus		0.9	0.5625	0.7875	0.675	0.5625	0.675	1	1	1	0.5625	1	1	0.3375	0.5625	0.7875	0.5625	0.45	0.5625	1	1	1	0.00122341	0.776371	0.000949821
Empidonax traillii		0.9	1	0.7875	0.5625	0.5625	0.675	1	1	1	0.5625	1	1	0.3375	0.5625	0.7875	0.5625	0.7875	0.5625	0.675	1	1	0.00214097	0.772152	0.00165315
Athene cunicularia		0.5625	1	0.7875	0.675	0.5625	0.675	1	1	1	0.5625	1	1	0.3375	0.45	0.7875	0.5625	0.45	0.5625	0.45	1	1	0.000489365	0.556962	0.000272558
Aquila chrysaetos chrysaetos		0.5625	1	0.7875	0.675	0.5625	0.675	1	0.5625	1	0.5625	1	1	0.3375	0.45	0.7875	0.5625	0.3375	0.5625	0.45	1	1	0.000206451	0.780591	0.000161154
Lonchura striata domestica		0.5625	1	0.7875	0.675	0.5625	0.675	1	0.5625	1	0.5625	1	0.9	0.3375	0.5625	0.7875	0.5625	0.45	0.45	1	1	1	0.000550535	0.780591	0.000429743
Apteryx rowi		0.5625	1	0.5625	0.675	0.45	0.675	1	1	1	0.5625	1	1	0.3375	0.5625	0.7875	0.5625	1	0.5625	0.45	0.5625	1	0.000436933	0.776371	0.000339222
Manacus vitellinus		0.9	1	0.7875	0.5625	0.5625	0.675	1	0.5625	1	0.5625	1	1	0.3375	0.45	0.7875	0.5625	1	0.5625	0.45	1	0.45	0.000367024	0.772152	0.000283398
Falco cherrug		0.5625	0.5625	0.7875	0.675	0.5625	0.675	1	0.5625	1	0.5625	1	1	0.3375	0.45	0.7875	0.5625	0.45	0.5625	0.45	1	1	0.000154838	0.776371	0.000120212
Corapipo altera		0.9	1	0.7875	0.5625	0.5625	0.675	1	0.5625	1	0.5625	1	1	0.3375	0.45	0.7875	0.5625	1	0.5625	0.45	1	0.5625	0.000458779	0.772152	0.000354247
Tyto alba alba		0.5625	1	0.7875	0.675	0.5625	0.675	1	1	1	0.5625	1	1	0.3375	0.675	0.7875	0.5625	0.45	0.5625	0.45	1	1	0.000734047	0.776371	0.000569893
Pipra filicauda		0.9	1	0.7875	0.5625	0.5625	0.675	1	0.5625	1	0.5625	1	1	0.3375	0.45	0.7875	0.5625	1	0.5625	0.45	1	0.45	0.000367024	0.772152	0.000283398
Corvus cornix cornix		0.5625	1	0.7875	0.675	0.5625	0.675	1	0.5625	1	0.5625	1	1	0.3375	0.45	0.7875	0.5625	1	0.5625	1	1	0.9	0.00122341	0.776371	0.000949821
Corvus moneduloides		0.5625	1	0.7875	0.675	0.5625	0.675	1	0.5625	1	0.5625	1	1	0.3375	0.45	0.7875	0.5625	1	0.5625	1	1	1	0.00135935	0.776371	0.00105536
Strigops habroptila		0.5625	1	0.7875	0.675	0.5625	0.675	1	0.5625	1	0.5625	1	1	0.3375	0.5625	0.7875	0.5625	0.45	0.5625	0.45	1	1	0.000344085	0.767932	0.000264234
Protobothrops mucrosquamatus		0.45	0.225	0.5625	0.5625	0.225	0.675	0.7875	1	1	0.7875	1	0.5625	0.3375	1	0.7875	1	1	0.5625	0.675	1	1	0.000171278	0.64135	0.000109849
Pseudonaja textilis		0.45	0.225	0.5625	0.5625	0.45	0.675	0.45	1	1	0.7875	1	0.5625	0.3375	0.7875	0.7875	1	1	0.5625	0.675	1	1	0.00015415	0.654008	0.000100815
Chelonia mydas		1	0.225	0.45	0.5625	0.3375	0.675	1	1	1	0.225	1	1	0.3375	0.675	1	0.5625	0.45	0.5625	0.45	1	1	4.26113e-05	0.64557	2.75086e-05
Chrysemys picta bellii		1	0.225	0.45	0.5625	0.3375	0.675	1	1	1	0.225	1	1	0.3375	0.675	1	0.5625	0.45	0.5625	0.45	1	1	4.26113e-05	0.658228	2.8048e-05
Terrapene carolina triunguis		1	0.225	0.45	0.5625	0.3375	0.675	1	1	1	0.225	1	1	0.3375	0.675	1	0.5625	0.45	0.5625	0.45	1	1	4.26113e-05	N/A	#VALUE!
Pelodiscus sinensis		0.3375	0.225	0.45	0.675	0.3375	0.5625	1	1	1	0.225	1	1	0.3375	0.675	1	1	0.45	0.5625	0.675	1	1	3.83502e-05	0.662447	2.5405e-05
Chelonoidis abingdonii		1	0.225	0.45	0.5625	0.3375	0.675	1	1	1	0.225	1	1	0.3375	0.675	0.7875	0.5625	0.3375	0.5625	0.45	1	1	2.51673e-05	0.666667	1.67782e-05
Gopherus evgoodei		1	0.225	0.45	0.5625	0.3375	0.675	1	1	1	0.225	1	1	0.3375	0.675	0.7875	0.5625	0.3375	0.5625	0.45	1	1	2.51673e-05	0.679325	1.70968e-05
Python bivittatus		0.45	0.225	0.5625	0.5625	0.3375	0.675	0.7875	1	1	0.45	1	0.45	0.3375	0.675	0.7875	0.5625	1	0.5625	0.675	1	1	4.45934e-05	0.658228	2.93526e-05
Pogona vitticeps		0.45	0.225	0.5625	0.675	0.225	0.5625	1	0.5625	1	0.5625	1	0.3375	0.3375	0.675	0.7875	1	0.45	0.5625	0.45	1	1	1.06175e-05	0.654008	6.94391e-06
Thamnophis elegans		0.45	0.225	0.5625	0.5625	0.225	0.675	0.7875	1	1	0.225	1	0.5625	0.3375	1	1	1	0.45	0.45	0.45	1	1	1.4914e-05	N/A	#VALUE!
Rhinatrema bivittatum		-	1	0.5625	0.5625	0.675	0.5625	1	1	0.675	0.5625	1	0.9	0.3375	0.675	1	0.45	0.45	0.3375	0.45	1	1	0.000287627	0.586498	0.000168692
Microcaecilia unicolor		-	0.5625	0.45	0.5625	0.5625	0.5625	1	1	0.5625	0.5625	1	0.5625	0.3375	0.675	1	0.5625	0.45	0.3375	0.45	1	1	7.02213e-05	0.590717	4.14809e-05
