# Supplementary material
Source: Elsevier journal article supplement (https://www.sciencedirect.com/science/article/pii/S2530064420300596)
Supplement: mmc6 [file S2530064420300596:mmc6.pdf]

| Model 1 |                                                                                                          |        | Model 2 |                                                                                                          |        | Model 3 |                                                                                                            |        |
|---------|----------------------------------------------------------------------------------------------------------|--------|---------|----------------------------------------------------------------------------------------------------------|--------|---------|------------------------------------------------------------------------------------------------------------|--------|
| R       | Species                                                                                                  |        | R       | Species                                                                                                  |        | R       | Species                                                                                                    |        |
| 1       | <i>Gorilla gorilla</i>  | 1      | 1       | <i>Gorilla gorilla</i>  | 1      | 1       | <i>Pan troglodytes</i>  | 1      |
|         | <i>Hylobates moloch</i>                                                                                  | 1      |         | <i>Hylobates moloch</i>                                                                                  | 1      | 2       | <i>Pan paniscus</i>                                                                                        | 0.9958 |
|         | <i>Macaca mulatta</i> <sup>1-E2</sup>                                                                    | 1      |         | <i>Macaca mulatta</i> <sup>1-E2</sup>                                                                    | 1      | 3       | <i>Gorilla gorilla</i>                                                                                     | 0.9831 |
|         | <i>Macaca nemestrina</i>                                                                                 | 1      |         | <i>Macaca nemestrina</i>                                                                                 | 1      | 4       | <i>Hylobates moloch</i>                                                                                    | 0.9620 |
|         | <i>Nomascus leucogenys</i>                                                                               | 1      |         | <i>Nomascus leucogenys</i>                                                                               | 1      | 5       | <i>Nomascus leucogenys</i>                                                                                 | 0.9536 |
|         | <i>Pan paniscus</i>                                                                                      | 1      |         | <i>Pan paniscus</i>                                                                                      | 1      |         | <i>Pongo abelii</i>                                                                                        | 0.9536 |
|         | <i>Pan troglodytes</i>                                                                                   | 1      |         | <i>Pan troglodytes</i>                                                                                   | 1      | 6       | <i>Ptilocolobus tephrosceles</i>                                                                           | 0.9283 |
|         | <i>Papio anubis</i>                                                                                      | 1      |         | <i>Papio anubis</i>                                                                                      | 1      | 7       | <i>Papio anubis</i>                                                                                        | 0.9114 |
|         | <i>Ptilocolobus tephrosceles</i>                                                                         | 1      |         | <i>Ptilocolobus tephrosceles</i>                                                                         | 1      | 8       | <i>Macaca mulatta</i> <sup>1-E2</sup>                                                                      | 0.9072 |
|         | <i>Pongo abelii</i>                                                                                      | 1      |         | <i>Pongo abelii</i>                                                                                      | 1      |         | <i>Macaca nemestrina</i>                                                                                   | 0.9072 |
| 2       | <i>Theropithecus gelada</i>                                                                              | 1      | 2       | <i>Theropithecus gelada</i>                                                                              | 1      | 9       | <i>Theropithecus gelada</i>                                                                                | 0.9030 |
|         | <i>Rhinopithecus roxellana</i>                                                                           | 0.9524 |         | <i>Rhinopithecus roxellana</i>                                                                           | 0.5625 | 10      | <i>Rhinopithecus roxellana</i>                                                                             | 0.5198 |
|         | <i>Aotus nancymae</i>                                                                                    | 0.8571 |         | <i>Aotus nancymae</i>                                                                                    | 0.2136 | 11      | <i>Aotus nancymae</i>                                                                                      | 0.1956 |
|         | <i>Callithrix jacchus</i> <sup>2-E2</sup>                                                                | 0.8571 |         | <i>Callithrix jacchus</i> <sup>2-E2</sup>                                                                | 0.2136 |         | <i>Sapajus apella</i>                                                                                      | 0.1956 |
|         | <i>Ictidomys tridecemlineatus</i>                                                                        | 0.8571 |         | <i>Sapajus apella</i>                                                                                    | 0.2136 | 12      | <i>Callithrix jacchus</i> <sup>2-E2</sup>                                                                  | 0.1838 |
|         | <i>Marmota flaviventris</i>                                                                              | 0.8571 |         | <i>Nannospalax galili</i>                                                                                | 0.2018 | 13      | <i>Nannospalax galili</i>                                                                                  | 0.1797 |
|         | <i>Sapajus apella</i>                                                                                    | 0.8571 |         | <i>Delphinapterus leucas</i>                                                                             | 0.1794 |         | <i>Delphinapterus leucas</i>                                                                               | 0.1620 |
|         | <i>Balaenoptera acutorostrata</i>                                                                        | 0.8095 |         | <i>Monodon monoceros</i>                                                                                 | 0.1794 |         | <i>Monodon monoceros</i>                                                                                   | 0.1620 |
|         |                                                                                                          | 0.8095 |         | <i>Neophocaena asiaeorientalis</i>                                                                       | 0.1794 | 14      | <i>Neophocaena asiaeorientalis</i>                                                                         | 0.1612 |
|         | <i>Felis catus</i> <sup>1-N1, 1-N3, 3-E2</sup>                                                           | 0.8095 |         | <i>Phocoena sinus</i>                                                                                    | 0.1794 |         | <i>Phocoena sinus</i>                                                                                      | 0.1612 |
| 3       | <i>Lynx canadensis</i>                                                                                   | 0.8095 | 6       | <i>Ictidomys tridecemlineatus</i>                                                                        | 0.1709 | 15      | <i>Ictidomys tridecemlineatus</i>                                                                          | 0.1543 |
|         | <i>Mesocricetus auratus</i> <sup>4-E2</sup>                                                              | 0.8095 |         | <i>Marmota flaviventris</i>                                                                              | 0.1709 | 16      | <i>Felis catus</i> <sup>1-N1, 1-N3, 3-E2</sup>                                                             | 0.1417 |
|         | <i>Monodon monoceros</i>                                                                                 | 0.8095 |         | <i>Felis catus</i> <sup>1-N1, 1-N3, 3-E2</sup>                                                           | 0.1570 | 17      | <i>Lynx canadensis</i>                                                                                     | 0.1411 |
|         | <i>Neophocaena asiaeorientalis</i>                                                                       | 0.8095 |         | <i>Lynx canadensis</i>                                                                                   | 0.1570 |         | <i>Panthera pardus</i>                                                                                     | 0.1411 |
|         | <i>Panthera pardus</i>                                                                                   | 0.8095 |         | <i>Panthera pardus</i>                                                                                   | 0.1570 | 18      | <i>Ovis aries</i>                                                                                          | 0.1408 |
|         | <i>Panthera tigris</i> <sup>2-N3</sup>                                                                   | 0.8095 |         | <i>Panthera tigris</i> <sup>2-N3</sup>                                                                   | 0.1570 | 19      | <i>Bos indicus x Bos taurus</i>                                                                            | 0.1395 |
|         | <i>Peromyscus leucopus</i>                                                                               | 0.8095 |         | <i>Puma concolor</i>                                                                                     | 0.1570 |         | <i>Bos taurus</i>                                                                                          | 0.1395 |
|         | <i>Phocoena sinus</i>                                                                                    | 0.8095 |         | <i>Bos indicus x Bos taurus</i>                                                                          | 0.1545 | 20      | <i>Odocoileus virginianus</i>                                                                              | 0.1376 |
|         | <i>Puma concolor</i>                                                                                     | 0.8095 |         | <i>Bos taurus</i>                                                                                        | 0.1545 | 21      | <i>Panthera tigris</i> <sup>2-N3</sup>                                                                     | 0.1278 |
|         | <i>Urocyon parryi</i>                                                                                    | 0.8095 |         | <i>Odocoileus virginianus</i>                                                                            | 0.1545 | 22      | <i>Urocyon parryi</i>                                                                                      | 0.1046 |
| 5       | <i>Nannospalax galili</i>                                                                                | 0.8000 | 8       | <i>Ovis aries</i>                                                                                        | 0.1545 | 23      | <i>Puma concolor</i>                                                                                       | 0.0960 |
|         | <i>Acinonyx jubatus</i>                                                                                  | 0.7619 |         | <i>Urocyon parryi</i>                                                                                    | 0.1153 | 24      | <i>Mesocricetus auratus</i> <sup>4-E2</sup>                                                                | 0.0642 |
|         | <i>Bos indicus x Bos taurus</i>                                                                          | 0.7619 |         | <i>Mesocricetus auratus</i> <sup>4-E2</sup>                                                              | 0.0721 | 25      | <i>Vicugna pacos</i>                                                                                       | 0.0640 |
|         | <i>Bos taurus</i>                                                                                        | 0.7619 |         | <i>Vicugna pacos</i>                                                                                     | 0.0715 | 26      | <i>Acinonyx jubatus</i>                                                                                    | 0.0635 |
|         | <i>Cricetulus griseus</i>                                                                                | 0.7619 |         | <i>Acinonyx jubatus</i>                                                                                  | 0.0706 | 27      | <i>Physeter catodon</i>                                                                                    | 0.0610 |
|         | <i>Delphinapterus leucas</i>                                                                             | 0.7619 |         | <i>Heterocephalus glaber</i>                                                                             | 0.0676 | 28      | <i>Heterocephalus glaber</i>                                                                               | 0.0582 |
|         | <i>Heterocephalus glaber</i>                                                                             | 0.7619 |         | <i>Physeter catodon</i>                                                                                  | 0.0673 | 29      | <i>Ursus arctos</i>                                                                                        | 0.0547 |
|         | <i>Microtus ochrogaster</i>                                                                              | 0.7619 |         | <i>Ursus arctos</i>                                                                                      | 0.0605 |         | <i>Canis dingo</i>                                                                                         | 0.0538 |
|         | <i>Ovis aries</i>                                                                                        | 0.7619 |         | <i>Canis dingo</i>                                                                                       | 0.0596 | 30      | <i>Canis familiaris</i> <sup>1-N1, 3-N3, 3-E2</sup>                                                        | 0.0538 |
|         | <i>Physeter catodon</i>                                                                                  | 0.7619 |         | <i>Canis familiaris</i> <sup>1-N1, 3-N3, 3-E2</sup>                                                      | 0.0596 |         | <i>Vulpes vulpes</i>                                                                                       | 0.0538 |
| 6       | <i>Ursus arctos</i>                                                                                      | 0.7619 | 17      | <i>Vulpes vulpes</i>                                                                                     | 0.0596 | 31      | <i>Peromyscus leucopus</i>                                                                                 | 0.0523 |
|         | <i>Camelus dromedarius</i>                                                                               | 0.7143 |         | <i>Peromyscus leucopus</i>                                                                               | 0.0577 | 32      | <i>Balaenoptera acutorostrata</i>                                                                          | 0.0521 |
|         | <i>Camelus ferus</i>                                                                                     | 0.7143 |         |                                                                                                          |        |         |                                                                                                            |        |
|         |                                                                                                          |        |         |                                                                                                          |        |         |                                                                                                            |        |
|         |                                                                                                          |        |         |                                                                                                          |        |         |                                                                                                            |        |
|         |                                                                                                          |        |         |                                                                                                          |        |         |                                                                                                            |        |
|         |                                                                                                          |        |         |                                                                                                          |        |         |                                                                                                            |        |
|         |                                                                                                          |        |         |                                                                                                          |        |         |                                                                                                            |        |
|         |                                                                                                          |        |         |                                                                                                          |        |         |                                                                                                            |        |
|         |                                                                                                          |        |         |                                                                                                          |        |         |                                                                                                            |        |
|         |                                                                                                          |        |         |                                                                                                          |        |         |                                                                                                            |        |
| 7       |                                                                                                          |        | 18      |                                                                                                          |        |         |                                                                                                            |        |



|    |                                                                                                                        |        |    |                                                                                                                   |        |    |                                                                                                                       |        |
|----|------------------------------------------------------------------------------------------------------------------------|--------|----|-------------------------------------------------------------------------------------------------------------------|--------|----|-----------------------------------------------------------------------------------------------------------------------|--------|
| 7  | <i>Microcebus murinus</i>                                                                                              | 0.7143 | 10 | <i>Balaenoptera acutorostrata</i>                                                                                 | 0.0577 | 33 | <i>Equus caballus</i>                                                                                                 | 0.0375 |
|    | <i>Vicugna pacos</i>                                                                                                   | 0.7143 | 19 | <i>Equus caballus</i>                                                                                             | 0.0429 | 34 | <i>Camelus dromedarius</i>                                                                                            | 0.0318 |
|    | <i>Canis dingo</i>                                                                                                     | 0.7000 |    | <i>Camelus dromedarius</i>                                                                                        | 0.0358 |    | <i>Camelus ferus</i>                                                                                                  | 0.0318 |
| 8  | <i>Canis familiaris</i> <sup>1-N1, 3-N3, 3-E2</sup>                                                                    | 0.7000 | 20 | <i>Camelus ferus</i>                                                                                              | 0.0358 | 35 | <i>Manis javanica</i>                                                                                                 | 0.0314 |
|    | <i>Vulpes vulpes</i>                                                                                                   | 0.7000 |    | <i>Manis javanica</i>                                                                                             | 0.0358 | 36 | <i>Microcebus murinus</i>                                                                                             | 0.0302 |
|    | <i>Callorhinus ursinus</i>                                                                                             | 0.6667 | 21 | <i>Microcebus murinus</i>                                                                                         | 0.0341 | 37 | <i>Phoca vitulina</i>                                                                                                 | 0.0241 |
|    | <i>Carlito syrichta</i>                                                                                                | 0.6667 | 22 | <i>Trichechus manatus</i>                                                                                         | 0.0338 | 38 | <i>Microtus ochrogaster</i>                                                                                           | 0.0231 |
|    | <i>Equus caballus</i>                                                                                                  | 0.6667 | 23 | <i>Neomonachus schauinslandi</i>                                                                                  | 0.0268 | 39 | <i>Cricetulus griseus</i>                                                                                             | 0.0221 |
|    | <i>Eumetopias jubatus</i>                                                                                              | 0.6667 | 23 | <i>Phoca vitulina</i>                                                                                             | 0.0268 | 40 | <i>Carlito syrichta</i>                                                                                               | 0.0191 |
|    | <i>Globicephala melas</i>                                                                                              | 0.6667 | 24 | <i>Microtus ochrogaster</i>                                                                                       | 0.0259 | 41 | <i>Lagenorhynchus obliquidens</i>                                                                                     | 0.0174 |
|    | <i>Lagenorhynchus obliquidens</i>                                                                                      | 0.6667 | 25 | <i>Cricetulus griseus</i>                                                                                         | 0.0243 | 42 | <i>Globicephala melas</i>                                                                                             | 0.0173 |
|    | <i>Manis javanica</i>                                                                                                  | 0.6667 | 26 | <i>Carlito syrichta</i>                                                                                           | 0.0210 |    | <i>Loxodonta africana</i>                                                                                             | 0.0173 |
| 9  | <i>Neomonachus schauinslandi</i>                                                                                       | 0.6667 | 27 | <i>Rhinolophus sinicus</i>                                                                                        | 0.0205 |    | <i>Eumetopias jubatus</i>                                                                                             | 0.0161 |
|    | <i>Octodon degus</i>                                                                                                   | 0.6667 | 28 | <i>Loxodonta africana</i>                                                                                         | 0.0193 | 43 | <i>Callorhinus ursinus</i>                                                                                            | 0.0161 |
|    | <i>Odocoileus virginianus</i>                                                                                          | 0.6667 |    | <i>Globicephala melas</i>                                                                                         | 0.0192 |    | <i>Orcinus orca</i>                                                                                                   | 0.0161 |
|    | <i>Orcinus orca</i>                                                                                                    | 0.6667 | 29 | <i>Lagenorhynchus obliquidens</i>                                                                                 | 0.0192 | 44 | <i>Otolemur garnettii</i>                                                                                             | 0.0158 |
|    | <i>Phoca vitulina</i>                                                                                                  | 0.6667 |    | <i>Orcinus orca</i>                                                                                               | 0.0192 | 45 | <i>Octodon degus</i>                                                                                                  | 0.0148 |
|    | <i>Pteropus alecto</i>                                                                                                 | 0.6667 | 30 | <i>Callorhinus ursinus</i>                                                                                        | 0.0179 | 46 | <i>Pteropus alecto</i>                                                                                                | 0.0146 |
|    | <i>Pteropus vampyrus</i>                                                                                               | 0.6667 |    | <i>Eumetopias jubatus</i>                                                                                         | 0.0179 |    | <i>Pteropus vampyrus</i>                                                                                              | 0.0146 |
|    | <i>Rhinolophus sinicus</i>                                                                                             | 0.6667 | 31 | <i>Otolemur garnettii</i>                                                                                         | 0.0172 | 47 | <i>Zalophus californianus</i>                                                                                         | 0.0127 |
|    | <i>Loxodonta africana</i>                                                                                              | 0.6190 | 32 | <i>Octodon degus</i>                                                                                              | 0.0164 | 48 | <i>Mustela erminea</i>                                                                                                | 0.0075 |
|    | <i>Otolemur garnettii</i>                                                                                              | 0.6190 | 33 | <i>Pteropus alecto</i>                                                                                            | 0.0160 |    | <i>Mustela putorius</i> <sup>5-E2</sup>                                                                               | 0.0075 |
| 10 | <i>Paguma larvata</i>                                                                                                  | 0.6190 |    | <i>Pteropus vampyrus</i>                                                                                          | 0.0160 | 49 | <i>Suricata suricatta</i>                                                                                             | 0.0070 |
|    | <i>Trichechus manatus</i>                                                                                              | 0.6190 | 34 | <i>Paguma larvata</i>                                                                                             | 0.0151 | 50 | <i>Phyllostomus discolor</i>                                                                                          | 0.0064 |
|    | <i>Zalophus californianus</i>                                                                                          | 0.6190 | 35 | <i>Zalophus californianus</i>                                                                                     | 0.0141 | 51 | <i>Lontra canadensis</i>                                                                                              | 0.0057 |
|    | <i>Enhydra lutris kenyonii</i>                                                                                         | 0.5714 |    | <i>Mustela erminea</i>                                                                                            | 0.0085 | 52 | <i>Vombatus ursinus</i>                                                                                               | 0.0046 |
|    | <i>Lontra canadensis</i>                                                                                               | 0.5714 | 36 | <i>Mustela putorius</i> <sup>5-E2</sup>                                                                           | 0.0085 | 53 | <i>Rhinolophus ferrumequinum</i>                                                                                      | 0.0045 |
| 11 | <i>Mustela erminea</i>                                                                                                 | 0.5714 | 37 | <i>Suricata suricatta</i>                                                                                         | 0.0078 | 54 | <i>Tupaia chinensis</i> <sup>6-E2</sup>                                                                               | 0.0036 |
|    | <i>Mustela putorius</i> <sup>5-E2</sup>                                                                                | 0.5714 | 38 | <i>Phyllostomus discolor</i>                                                                                      | 0.0071 | 55 | <i>Mastomys coucha</i>                                                                                                | 0.0034 |
|    | <i>Rhinolophus ferrumequinum</i>                                                                                       | 0.5714 | 39 | <i>Lontra canadensis</i>                                                                                          | 0.0064 | 56 | <i>Desmodus rotundus</i>                                                                                              | 0.0020 |
|    | <i>Eptesicus fuscus</i>                                                                                                | 0.5238 | 39 | <i>Enhydra lutris kenyonii</i>                                                                                    | 0.0064 |    | <i>Rattus norvegicus</i>                                                                                              | 0.0017 |
|    | <i>Grammomys surdaster</i>                                                                                             | 0.5238 | 40 | <i>Vombatus ursinus</i>                                                                                           | 0.0053 | 57 | <i>Empidonax traillii</i>        | 0.0017 |
| 12 | <i>Phyllostomus discolor</i>                                                                                           | 0.5238 | 41 | <i>Rhinolophus ferrumequinum</i>                                                                                  | 0.0048 |    | <i>Grammomys surdaster</i>       | 0.0017 |
|    | <i>Suricata suricatta</i>                                                                                              | 0.5238 | 42 | <i>Tupaia chinensis</i> <sup>6-E2</sup>                                                                           | 0.0046 | 58 | <i>Serinus canaria</i>           | 0.0015 |
|    | <i>Tupaia chinensis</i> <sup>6-E2</sup>                                                                                | 0.5238 | 43 | <i>Mastomys coucha</i>                                                                                            | 0.0039 |    | <i>Nothoprocta perdicaria</i>                                                                                         | 0.0013 |
|    | <i>Nothoprocta perdicaria</i>       | 0.4762 | 44 | <i>Eptesicus fuscus</i>                                                                                           | 0.0032 | 59 | <i>Echinops telfairi</i>         | 0.0013 |
| 13 | <i>Mastomys coucha</i>              | 0.4762 | 45 | <i>Empidonax traillii</i>      | 0.0021 |    | <i>Ornithorhynchus anatinus</i>                                                                                       | 0.0013 |
|    | <i>Rattus norvegicus</i>                                                                                               | 0.4762 |    | <i>Desmodus rotundus</i>       | 0.0021 |    | <i>Corvus moneduloides</i>       | 0.0011 |
| 14 | <i>Ornithorhynchus anatinus</i>                                                                                        | 0.4500 | 46 | <i>Serinus canaria</i>         | 0.0019 | 60 | <i>Myotis lucifugus</i>          | 0.0011 |
|    | <i>Anas platyrhynchos</i>           | 0.4286 |    | <i>Rattus norvegicus</i>       | 0.0019 |    | <i>Rattus rattus</i>                                                                                                  | 0.0010 |
|    | <i>Corvus moneduloides</i>                                                                                             | 0.4286 | 47 | <i>Grammomys surdaster</i>                                                                                        | 0.0018 | 61 | <i>Dromaius novaehollandiae</i>  | 0.0010 |
|    | <i>Dromaius novaehollandiae</i>                                                                                        | 0.4286 | 48 | <i>Nothoprocta perdicaria</i>  | 0.0017 |    | <i>Taeniopygia guttata</i>                                                                                            | 0.0010 |
|    | <i>Serinus canaria</i>                                                                                                 | 0.4286 |    | <i>Corvus moneduloides</i>                                                                                        | 0.0014 | 62 | <i>Corvus cornix</i>                                                                                                  | 0.0009 |
|    | <i>Mus musculus</i> <sup>7-E</sup>  | 0.4286 | 49 | <i>Echinops telfairi</i>       | 0.0014 |    | <i>Cyanistes caeruleus</i>                                                                                            | 0.0009 |



|                         |                                      |                              |                                      |                                     |                                      |                                     |                                |                         |        |
|-------------------------|--------------------------------------|------------------------------|--------------------------------------|-------------------------------------|--------------------------------------|-------------------------------------|--------------------------------|-------------------------|--------|
| 15                      | <i>Myotis lucifugus</i>              | 0.4286                       | 50                                   | <i>Ornithorhynchus anatinus</i>     | 0.0014                               | 63                                  | <i>Neopelma chrysocephalum</i> | 0.0008                  |        |
|                         | <i>Rattus rattus</i>                 | 0.4286                       |                                      | <i>Dromaius novaehollandiae</i>     | 0.0012                               | <i>Zonotrichia albicollis</i>       | 0.0006                         |                         |        |
|                         | <i>Chelonia mydas</i>                | 0.4286                       |                                      | <i>Corvus cornix</i>                | 0.0012                               | 64                                  | <i>Camarhynchus parvulus</i>   | 0.0006                  |        |
|                         | <i>Chrysemys picta</i>               | 0.4286                       |                                      | <i>Taeniopygia guttata</i>          | 0.0012                               | <i>Tyto alba</i>                    | 0.0006                         |                         |        |
|                         | <i>Pelodiscus sinensis</i>           | 0.4286                       |                                      | <i>Cyanistes caeruleus</i>          | 0.0012                               | 65                                  | <i>Anas platyrhynchos</i>      | 0.0005                  |        |
|                         | <i>Terrapene carolina</i>            | 0.4286                       |                                      | <i>Myotis lucifugus</i>             | 0.0012                               | <i>Mus musculus</i> <sup>7-E</sup>  | 0.0005                         |                         |        |
|                         | <i>Apteryx rowi</i>                  | 0.3810                       |                                      | 51                                  | <i>Rattus rattus</i>                 | 0.0011                              | <i>Lonchura striata</i>        | 0.0004                  |        |
|                         | <i>Athene cunicularia</i>            | 0.3810                       | 52                                   | <i>Neopelma chrysocephalum</i>      | 0.0010                               | 66                                  | <i>Corapipo altera</i>         | 0.0004                  |        |
|                         | <i>Corvus cornix</i>                 | 0.3810                       | <i>Zonotrichia albicollis</i>        | 0.0008                              | <i>Apteryx rowi</i>                  | 0.0003                              |                                |                         |        |
|                         | <i>Coturnix japonica</i>             | 0.3810                       | 53                                   | <i>Camarhynchus parvulus</i>        | 0.0008                               | <i>Manacus vitellinus</i>           | 0.0003                         |                         |        |
|                         | <i>Cyanistes caeruleus</i>           | 0.3810                       | <i>Tyto alba alba</i>                | 0.0007                              | 67                                   | <i>Pipra filicauda</i>              | 0.0003                         |                         |        |
|                         | <i>Empidonax traillii</i>            | 0.3810                       | 54                                   | <i>Anas platyrhynchos</i>           | 0.0007                               | <i>Athene cunicularia</i>           | 0.0003                         |                         |        |
|                         | <i>Gallus gallus</i> <sup>1-E1</sup> | 0.3810                       | 55                                   | <i>Xenopus tropicalis</i>           | 0.0006                               | <i>Strigops habroptila</i>          | 0.0003                         |                         |        |
|                         | <i>Meleagris gallopavo</i>           | 0.3810                       | <i>Lonchura striata</i>              | 0.0006                              | <i>Rhinatrema bivittatum</i>         | 0.0002                              |                                |                         |        |
|                         | <i>Melopsittacus undulatus</i>       | 0.3810                       | <i>Athene cunicularia</i>            | 0.0005                              | <i>Gallus gallus</i> <sup>1-E1</sup> | 0.0002                              |                                |                         |        |
|                         | 16                                   | <i>Numida meleagris</i>      | 0.3810                               | 56                                  | <i>Corapipo altera</i>               | 0.0005                              | 68                             | <i>Numida meleagris</i> | 0.0002 |
|                         |                                      | <i>Phasianus colchicus</i>   | 0.3810                               | <i>Mus musculus</i> <sup>7-E</sup>  | 0.0005                               | <i>Calypte anna</i>                 | 0.0002                         |                         |        |
|                         |                                      | <i>Taeniopygia guttata</i>   | 0.3810                               | <i>Apteryx rowi</i>                 | 0.0004                               | <i>Aquila chrysaetos</i>            | 0.0002                         |                         |        |
|                         |                                      | <i>Tyto alba</i>             | 0.3810                               | 57                                  | <i>Manacus vitellinus</i>            | 0.0004                              | <i>Falco cherrug</i>           | 0.0001                  |        |
|                         | <i>Desmodus rotundus</i>             | 0.3810                       | <i>Pipra filicauda</i>               | 0.0004                              | 69                                   | <i>Protobothrops mucrosquamatus</i> | 0.0001                         |                         |        |
|                         | <i>Echinops telfairi</i>             | 0.3810                       | <i>Rhinatrema bivittatum</i>         | 0.0003                              | <i>Pseudonaja textilis</i>           | 0.0001                              |                                |                         |        |
| <i>Vombatus ursinus</i> | 0.3810                               | <i>Strigops habroptila</i>   | 0.0003                               | 70                                  | <i>Coturnix japonica</i>             | 9.77E-05                            |                                |                         |        |
|                         | <i>Chelonoidis abingdonii</i>        | 0.3810                       | <i>Gallus gallus</i> <sup>1-E1</sup> | 0.0003                              | <i>Meleagris gallopavo</i>           | 9.77E-05                            |                                |                         |        |
|                         | <i>Gopherus evgoodei</i>             | 0.3810                       | 58                                   | <i>Numida meleagris</i>             | 0.0003                               | 71                                  | <i>Catharus ustulatus</i>      | 8.29E-05                |        |
|                         | <i>Protobothrops mucrosquamatus</i>  | 0.3810                       | <i>Melopsittacus undulatus</i>       | 0.0003                              | 72                                   | <i>Phasianus colchicus</i>          | 6.51E-05                       |                         |        |
|                         | <i>Thamnophis elegans</i>            | 0.3810                       | <i>Calypte anna</i>                  | 0.0003                              | 73                                   | <i>Microcaecilia unicolor</i>       | 4.15E-05                       |                         |        |
|                         | 17                                   | <i>Rhinatrema bivittatum</i> | 0.3500                               | <i>Aquila chrysaetos</i>            | 0.0002                               | 74                                  | <i>Python bivittatus</i>       | 2.94E-05                |        |
|                         | <i>Xenopus tropicalis</i>            | 0.3500                       | <i>Falco cherrug</i>                 | 0.0002                              | 75                                   | <i>Chrysemys picta</i>              | 2.80E-05                       |                         |        |
|                         | <i>Microcaecilia unicolor</i>        | 0.3333                       | 59                                   | <i>Protobothrops mucrosquamatus</i> | 0.0002                               | 76                                  | <i>Chelonia mydas</i>          | 2.75E-05                |        |
|                         | <i>Aquila chrysaetos</i>             | 0.3333                       | <i>Pseudonaja textilis</i>           | 0.0002                              | 77                                   | <i>Pelodiscus sinensis</i>          | 2.54E-05                       |                         |        |
|                         | <i>Calypte anna</i>                  | 0.3333                       | <i>Coturnix japonica</i>             | 0.0001                              | 78                                   | <i>Gopherus evgoodei</i>            | 1.71E-05                       |                         |        |
|                         | <i>Camarhynchus parvulus</i>         | 0.3333                       | 60                                   | <i>Meleagris gallopavo</i>          | 0.0001                               | 79                                  | <i>Chelonoidis abingdonii</i>  | 1.68E-05                |        |
|                         | <i>Corapipo altera</i>               | 0.3333                       | <i>Catharus ustulatus</i>            | 0.0001                              | 80                                   | <i>Pogona vitticeps</i>             | 6.94E-06                       |                         |        |
|                         | 18                                   | <i>Lonchura striata</i>      | 0.3333                               | 61                                  | <i>Phasianus colchicus</i>           | 8.39E-05                            |                                |                         |        |
|                         | <i>Manacus vitellinus</i>            | 0.3333                       | 62                                   | <i>Microcaecilia unicolor</i>       | 7.02E-05                             |                                     |                                |                         |        |
|                         | <i>Neopelma chrysocephalum</i>       | 0.3333                       | 63                                   | <i>Python bivittatus</i>            | 4.46E-05                             |                                     |                                |                         |        |
|                         | <i>Pipra filicauda</i>               | 0.3333                       | <i>Chelonia mydas</i>                | 4.26E-05                            |                                      |                                     |                                |                         |        |
|                         | <i>Strigops habroptila</i>           | 0.3333                       | 64                                   | <i>Chrysemys picta</i>              | 4.26E-05                             |                                     |                                |                         |        |
|                         | <i>Zonotrichia albicollis</i>        | 0.3333                       | <i>Terrapene carolina</i>            | 4.26E-05                            |                                      |                                     |                                |                         |        |
|                         | <i>Pseudonaja textilis</i>           | 0.3000                       | 65                                   | <i>Pelodiscus sinensis</i>          | 3.84E-05                             |                                     |                                |                         |        |
|                         | <i>Falco cherrug</i>                 | 0.2857                       | 66                                   | <i>Chelonoidis abingdonii</i>       | 2.52E-05                             |                                     |                                |                         |        |
|                         | 19                                   | <i>Pogona vitticeps</i>      | 0.2857                               | 67                                  | <i>Gopherus evgoodei</i>             | 2.52E-05                            |                                |                         |        |
|                         | <i>Python bivittatus</i>             | 0.2857                       | 68                                   | <i>Thamnophis elegans</i>           | 1.49E-05                             |                                     |                                |                         |        |
| 20                      | <i>Catharus ustulatus</i>            | 0.2381                       |                                      | <i>Pogona vitticeps</i>             | 1.06E-05                             |                                     |                                |                         |        |

Mammals

Birds

Reptiles

Amphibians

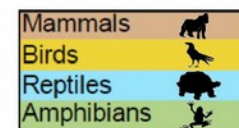

M, Model. Species with infection evidence: N1 (natural, PCR negative); N3 (natural, PCR positive without histopathological); E1 (experimental, PCR negative); E2 (experimental; PCR positive and histopathological lesions). 1-E2 (Bao et al., 2020a; Lu S et al., 2020; Munster et al., 2020; Shan et al., 2020; Yu et al., 2020); 2-E2 (Lu S et al., 2020); 3-E2 (Shi et al., 2020; Halfmann et al., 2020); 4-E2 (Chan et al., 2020; Sia et al., 2020); 5-E2 (Kim et al., 2020; Schlottau et al., 2020; Shi et al., 2020); 6-E2 (Zhao et al., 2020); 7-E (Bao et al., 2020b); 1-E1 (Schlottau et al., 2020; Shi et al., 2020); 1-N1 (Telmam et al., 2020); 1-N3 (FASFC, 2020; APHIS-USA 2020; Zientara, 2020); 2-N3 (WCS, 2020) and 3-N3 (Sit et al., 2020; FASFC 2020).
